# Supplementary material
Source: ML conference proceedings conference paper supplement (https://proceedings.neurips.cc/paper_files/paper/2019/hash/6d1e481bdcf159961818823e652a7725-Abstract.html)
Supplement: Supplementary file [file 6d1e481bdcf159961818823e652a7725-Supplemental.zip]

---

# Online Optimal Control with Linear Dynamics and Predictions: Algorithms and Regret Analysis

---

**Yingying Li**  
SEAS

Harvard University  
Cambridge, MA, 02138  
yingyingli@g.harvard.edu

**Xin Chen**  
SEAS

Harvard University  
Cambridge, MA, 02138  
chen\_xin@g.harvard.edu

**Na Li**  
SEAS

Harvard University  
Cambridge, MA, 02138  
nali@seas.harvard.edu

## Abstract

This paper studies the online optimal control problem with time-varying convex stage costs for a time-invariant linear dynamical system, where a finite lookahead window of accurate predictions of the stage costs are available at each time. We design online algorithms, Receding Horizon Gradient-based Control (RHGC), that utilize the predictions through finite steps of gradient computations. We study the algorithm performance measured by *dynamic regret*: the online performance minus the optimal performance in hindsight. It is shown that the dynamic regret of RHGC decays exponentially with the size of the lookahead window. In addition, we provide a fundamental limit of the dynamic regret for any online algorithms by considering linear quadratic tracking problems. The regret upper bound of one RHGC method almost reaches the fundamental limit, demonstrating the effectiveness of the algorithm. Finally, we numerically test our algorithms for both linear and nonlinear systems to show the effectiveness and generality of our RHGC.

## 1 Introduction

In this paper, we consider a  $N$ -horizon discrete-time sequential decision-making problem. At each time  $t = 0, \dots, N - 1$ , the decision maker observes a state  $x_t$  of a dynamical system, receives a  $W$ -step lookahead window of future cost functions of states and control actions, i.e.  $f_t(x) + g_t(u), \dots, f_{t+W-1}(x) + g_{t+W-1}(u)$ , then decides the control input  $u_t$  which drives the system to a new state  $x_{t+1}$  following some known dynamics. For simplicity, we consider a linear time-invariant (LTI) system  $x_{t+1} = Ax_t + Bu_t$  with  $(A, B)$  known in advance. The goal is to minimize the overall cost over the  $N$  time steps. This problem enjoys many applications in, e.g. data center management [1, 2], robotics [3], autonomous driving [4, 5], energy systems [6], manufacturing [7, 8]. Hence, there has been a growing interest on the problem, from both control and online optimization communities.

In the control community, studies on the above problem focus on economic model predictive control (EMPC), which is a variant of model predictive control (MPC) with a primary goal on optimizing economic costs [9, 10, 11, 12, 13, 14, 15, 16]. Recent years have seen a lot of attention on the optimality performance analysis of EMPC, under both time-invariant costs [17, 18, 19] and time-varying costs [20, 12, 14, 21, 22]. However, most studies focus on asymptotic performance and there is still limited understanding on the non-asymptotic performance, especially under time-varying costs. Moreover, for computationally efficient algorithms, e.g. suboptimal MPC and inexact MPC [23, 24, 25, 26], there is limited work on the optimality performance guarantee.

In online optimization, on the contrary, there are many papers on the non-asymptotic performance analysis, where the performance is usually measured by regret, e.g., static regrets [27, 28], dynamic regrets [29], etc., but most work does not consider predictions and/or dynamical systems. Further, motivated by the applications with predictions, e.g. predictions of electricity prices in data center

management problems [30, 31], there is a growing interest on the effect of predictions on the online problems [32, 33, 30, 34, 31, 35, 36]. However, though some papers consider switching costs which can be viewed as a simple and special dynamical model [37, 36], there is a lack of study on the general dynamical systems and on how predictions affect the online problem with dynamical systems.

In this paper, we propose novel gradient-based online control algorithms, receding horizon gradient-based control (RHGC), and provide nonasymptotic optimality guarantees by dynamic regrets. RHGC can be based on many gradient methods, e.g. vanilla gradient descent, Nesterov’s accelerated gradient, triple momentum, etc., [38, 39]. Due to the space limit, this paper only presents receding horizon gradient descent (RHGD) and receding horizon triple momentum (RHTM). For the theoretical analysis, we assume strongly convex and smooth cost functions, whereas applying RHGC does not require these conditions. Specifically, we show that the regret bounds of RHGD and RHTM decay exponentially with the prediction window’s size  $W$ , demonstrating that our algorithms efficiently utilize the prediction. Besides, our regret bounds decrease when the system is more “agile” in the sense of a controllability index [40]. Further, we provide a fundamental limit for any online control algorithms and show that the fundamental lower bound almost matches the regret upper bound of RHTM. This indicates that RHTM achieves near-optimal performance at least in the worst case. We also provide some discussion on the classic linear quadratic tracking problems, a widely studied control problem in literature, to provide more insightful interpretations of our results. Finally, we numerically test our algorithms. In addition to linear systems, we also apply RHGC to a nonlinear dynamical system: path tracking by a two-wheeled robot. Results show that RHGC works effectively for nonlinear systems though RHGC is only presented and theoretical analyzed on LTI systems.

Results in this paper are built on a paper on online optimization with switching costs [36]. Compared with [36], this paper studies online optimal control with *general linear dynamics*, which includes [36] as a special case; and studies how the system controllability index affects the regrets.

There has been some recent work on online optimal control problems with time-varying costs [41, 42, 37, 43] and/or time-varying disturbances [43], but most papers focus on the no-prediction cases. As we show later in this paper, these algorithms can be used in our RHGC methods as initialization oracles. Moreover, our regret analysis shows that RHGC can reduce the regret of these no-prediction online algorithms by a factor exponentially decaying with the prediction window’s size.

Finally, we would like to mention another related line of work: learning-based control [44, 45, 46, 47, 48]. In some sense, the results in this paper are orthogonal to that of the learning-based control, because the learning-based control usually considers a time-invariant environment but unknown dynamics, and aims to learn system dynamics or optimal controllers by data; while this paper considers a time-varying scenario with known dynamics but changing objectives and studies decision making with limited predictions. It is an interesting future direction to combine the two lines of work for designing more applicable algorithms.

**Notations.** Consider matrices  $A$  and  $B$ ,  $A \geq B$  means  $A - B$  is positive semidefinite and  $[A, B]$  denotes a block matrix. The norm  $\|\cdot\|$  refers to the  $L_2$  norm for both vectors and matrices. Let  $x^i$  denote the  $i$ th entry of the vector. Consider a set  $\mathcal{I} = \{k_1, \dots, k_m\}$ , then  $x^{\mathcal{I}} = (x^{k_1}, \dots, x^{k_m})^\top$ , and  $A(\mathcal{I}, :)$  denotes the  $\mathcal{I}$  rows of matrix  $A$  stacked together. Let  $I_m$  be an identity matrix in  $\mathbb{R}^{m \times m}$ .

## 2 Problem formulation and preliminaries

Consider a finite-horizon discrete-time optimal control problem with time-varying cost functions  $f_t(x_t) + g_t(u_t)$  and a linear time-invariant (LTI) dynamical system:

$$\begin{aligned} \min_{\mathbf{x}, \mathbf{u}} \quad & J(\mathbf{x}, \mathbf{u}) = \sum_{t=0}^{N-1} [f_t(x_t) + g_t(u_t)] + f_N(x_N) \\ \text{s.t.} \quad & x_{t+1} = Ax_t + Bu_t, \quad t \geq 0 \end{aligned} \quad (1)$$

where  $x_t \in \mathbb{R}^n$ ,  $u_t \in \mathbb{R}^m$ ,  $\mathbf{x} = (x_1^\top, \dots, x_N^\top)^\top$ ,  $\mathbf{u} = (u_0^\top, \dots, u_{N-1}^\top)^\top$ ,  $x_0$  is given,  $f_N(x_N)$  is the terminal cost.<sup>1</sup> To solve the optimal control problem (1), all cost functions from  $t = 0$  to  $t = N$  are needed. However, at each time  $t$ , usually only a finite lookahead window of cost functions are available and the decision maker needs to make an online decision  $u_t$  using the available information.

<sup>1</sup>The results in this paper can be extended to cost  $c_t(x_t, u_t)$  with proper assumptions.

In particular, we consider a simplified prediction model: at each time  $t$ , the decision maker obtains accurate predictions for the next  $W$  time steps,  $f_t, g_t, \dots, f_{t+W-1}, g_{t+W-1}$ , but no further prediction beyond these  $W$  steps, meaning that  $f_{t+W}, g_{t+W}, \dots$  can even be adversarially generated. Though this prediction model may be too optimistic in the short term and over pessimistic in the long term, this model i) captures a commonly observed phenomenon in predictions that short-term predictions are usually much more accurate than the long-term predictions; ii) allows researchers to derive insights for the role of predictions and possibly to extend to more complicated cases [31, 30, 49, 50].

The online optimal control problem is described as follows: at each time step  $t = 0, 1, \dots$ ,

- the agent observes state  $x_t$  and receives prediction  $f_t, g_t, \dots, f_{t+W-1}, g_{t+W-1}$ ;
- the agent decides and implements a control  $u_t$  and suffers the cost  $f_t(x_t) + g_t(u_t)$ ;
- the system evolves to the next state  $x_{t+1} = Ax_t + Bu_t$ .<sup>2</sup>

An online control algorithm, denoted as  $\mathcal{A}$ , can be defined as a mapping from the prediction information and the history information to the control action, denoted by  $u_t(\mathcal{A})$ :

$$u_t(\mathcal{A}) = \mathcal{A}(x_t(\mathcal{A}), \dots, x_0(\mathcal{A}), \{f_s, g_s\}_{s=0}^{t+W-1}), \quad t \geq 0, \quad (2)$$

where  $x_t(\mathcal{A})$  is the state generated by implementing  $\mathcal{A}$  and  $x_0(\mathcal{A}) = x_0$  is given.

This paper evaluates the performance of online control algorithms by comparing against the optimal control cost  $J^*$  in hindsight, that is,  $J^* := \min\{J(\mathbf{x}, \mathbf{u}) \mid x_{t+1} = Ax_t + Bu_t, \forall t \geq 0\}$ .

In this paper, the performance of an online algorithm  $\mathcal{A}$  is measured by<sup>3</sup>

$$\text{Regret}(\mathcal{A}) := J(\mathcal{A}) - J^* = J(\mathbf{x}(\mathcal{A}), \mathbf{u}(\mathcal{A})) - J^*, \quad (3)$$

which is sometimes called as *dynamic regret* [29, 51] or *competitive difference* [52]. Another popular regret notion is the static regret, which compares the online performance with the optimal static controller/policy [42, 41]. The benchmark in static regret is weaker than that in dynamic regret because the optimal controller may be far from being static, and it has been shown in literature that  $o(N)$  static regret can be achieved even without predictions (i.e.,  $W = 0$ ). Thus, we will focus on the dynamic regret analysis and study how predictions can improve the dynamic regret.

**Example 1** (Linear quadratic (LQ) tracking). Consider a discrete-time tracking problem for a system  $x_{t+1} = Ax_t + Bu_t$ . The goal is to minimize the quadratic tracking loss of a trajectory  $\{\theta_t\}_{t=0}^N$

$$J(\mathbf{x}, \mathbf{u}) = \frac{1}{2} \sum_{t=0}^{N-1} \left[ (x_t - \theta_t)^\top Q_t (x_t - \theta_t) + u_t^\top R_t u_t \right] + \frac{1}{2} (x_N - \theta_N)^\top Q_N (x_N - \theta_N).$$

In practice, it is usually difficult to know the complete trajectory  $\{\theta_t\}_{t=0}^N$  a priori, what are revealed are usually the next few steps, making it an online control problem with predictions.

**Assumptions and useful concepts.** Firstly, we assume controllability, which is standard in control theory and roughly means that the system can be steered to any state by proper control inputs [53].

**Assumption 1.** The LTI system  $x_{t+1} = Ax_t + Bu_t$  is controllable.

It is well-known that any controllable LTI system can be linearly transformed to a canonical form [40] and the linear transformation can be computed efficiently a priori using  $A$  and  $B$ , which can further be used to reformulate the cost functions  $f_t, g_t$ . Thus, without loss of generality, this paper only considers LTI systems in the canonical form, defined as follows.

**Definition 1** (Canonical form). A system  $x_{t+1} = Ax_t + Bu_t$  is said to be in the canonical form if

$$A = \begin{bmatrix} 0 & 1 & 0 & & & & & & \\ \vdots & \ddots & \ddots & & & & & & \\ & & 0 & 1 & & & & & \\ * & * & \dots & * & * & \dots & * & \dots & * \\ & & & 0 & 1 & 0 & & \dots & \\ & & & & \ddots & \ddots & & & \\ & & & & & 0 & 1 & & \\ * & * & \dots & * & * & \dots & * & \dots & * \\ \dots & & & & & & 0 & 1 & \dots & 0 \\ & & & & & & & \ddots & \ddots & \\ * & * & \dots & * & * & \dots & * & \dots & 0 & 1 \end{bmatrix}, \quad B = \begin{bmatrix} 0 & 0 & \dots \\ \vdots & \vdots & \vdots \\ 0 & 1 & 0 & \dots \\ 0 & 0 & & \\ \vdots & \vdots & \dots & \\ \vdots & \vdots & & \\ 0 & 1 & \dots \\ \vdots & \vdots & \dots \\ 0 & \dots & \dots \\ \vdots & \vdots & \\ 0 & 0 & \dots & 1 \end{bmatrix},$$

<sup>2</sup>We assume known  $A, B$ , no process noises, state feedback, and leave relaxing assumptions as future work.

<sup>3</sup>The optimality gap depends on initial state  $x_0$  and  $\{f_t, g_t\}_{t=0}^N$ , but we omit them for simplicity of notation.

where each  $*$  represents a (possibly) nonzero entry, and the rows of  $B$  with 1 are the same rows of  $A$  with  $*$  and the indices of these rows are denoted as  $\{k_1, \dots, k_m\} =: \mathcal{I}$ . Moreover, let  $p_i = k_i - k_{i-1}$  for  $1 \leq i \leq m$ , where  $k_0 = 0$ . The controllability index of a canonical-form  $(A, B)$  is defined as

$$p = \max\{p_1, \dots, p_m\}.$$

Next, we introduce assumptions on the cost functions and their optimal solutions.

**Assumption 2.** Assume  $f_t$  is  $\mu_f$  strongly convex and  $l_f$  Lipschitz smooth for  $0 \leq t \leq N$ , and  $g_t$  is convex and  $l_g$  Lipschitz smooth for  $0 \leq t \leq N-1$  for some  $\mu_f, l_f, l_g > 0$ .

**Assumption 3.** Assume the minimizers to  $f_t, g_t$ , denoted as  $\theta_t = \arg \min_x f_t(x)$ ,  $\xi_t = \arg \min_u g_t(u)$ , are uniformly bounded, i.e. there exist  $\bar{\theta}, \bar{\xi}$  such that  $\|\theta_t\| \leq \bar{\theta}$ ,  $\|\xi_t\| \leq \bar{\xi}$ ,  $\forall t$ .

These assumptions are commonly adopted in convex analysis. The uniform bounds rule out extreme cases. Notice that the LQ tracking problem in Example 1 satisfies Assumption 2 and 3 if  $Q_t, R_t$  are positive definite with uniform bounds on the eigenvalues and if  $\theta_t$  are uniformly bounded for all  $t$ .

### 3 Online control algorithms: receding horizon gradient-based control

This section introduces our online control algorithms, receding horizon gradient-based control (RHGC). The design is by first converting the online control problem to an equivalent online optimization problem with *finite temporal-coupling* costs, then designing gradient-based online optimization algorithms by utilizing this finite temporal-coupling property.

#### 3.1 Problem transformation

Firstly, we notice that the offline optimal control problem (1) can be viewed as an optimization with equality constraints over  $\mathbf{x}$  and  $\mathbf{u}$ . The individual stage cost  $f_t(x_t) + g_t(u_t)$  only depends on the current  $x_t$  and  $u_t$  but the equality constraints couple  $x_t, u_t$  with  $x_{t+1}$  for each  $t$ . In the following, we will rewrite (1) in an equivalent form of an *unconstrained* optimization problem on some entries of  $x_t$  for all  $t$ , but the new stage cost at each time  $t$  will depend on these new entries across a few nearby time steps. We will harness this structure to design our online algorithm.

In particular, the entries of  $x_t$  adopted in the reformulation are:  $x_t^{k_1}, \dots, x_t^{k_m}$ , where  $\mathcal{I} = \{k_1, \dots, k_m\}$  is defined in Definition 1. For ease of notation, we define

$$z_t := (x_t^{k_1}, \dots, x_t^{k_m})^\top, \quad t \geq 0 \quad (4)$$

and write  $z_t^j = x_t^{k_j}$  where  $j = 1, \dots, m$ . Let  $\mathbf{z} := (z_1^\top, \dots, z_N^\top)^\top$ . By the canonical-form equality constraint  $x_t = Ax_{t-1} + Bu_{t-1}$ , we have  $x_t^i = x_{t-1}^{i+1}$  for  $i \notin \mathcal{I}$ , so  $x_t$  can be represented by  $z_{t-p+1}, \dots, z_t$  in the following way:

$$x_t = (\underbrace{z_{t-p_1+1}^1, \dots, z_t^1}_{p_1}, \underbrace{z_{t-p_2+1}^2, \dots, z_t^2}_{p_2}, \dots, \underbrace{z_{t-p_m+1}^m, \dots, z_t^m}_{p_m})^\top, \quad t \geq 0, \quad (5)$$

where  $z_t$  for  $t \leq 0$  is determined by  $x_0$  in a way to let (5) hold for  $t = 0$ . For ease of exposition and without loss of generality, we consider  $x_0 = 0$  in this paper; then we have  $z_t = 0$  for  $t \leq 0$ . Similarly,  $u_t$  can be determined by  $z_{t-p+1}, \dots, z_t, z_{t+1}$  by

$$u_t = z_{t+1} - A(\mathcal{I}, :)x_t = z_{t+1} - A(\mathcal{I}, :)(z_{t-p_1+1}^1, \dots, z_t^1, \dots, z_{t-p_m+1}^m, \dots, z_t^m)^\top, \quad t \geq 0 \quad (6)$$

where  $A(\mathcal{I}, :)$  consists of  $k_1, \dots, k_m$  rows of  $A$ .

It is straightforward to verify that equations (4, 5, 6) describe a bijective transformation between  $\{(\mathbf{x}, \mathbf{u}) \mid x_{t+1} = Ax_t + Bu_t\}$  and  $\mathbf{z} \in \mathbb{R}^{mN}$ , since the LTI constraint  $x_{t+1} = Ax_t + Bu_t$  is naturally embedded in the relation (5, 6). Therefore, based on the transformation, an optimization problem with respect to  $\mathbf{z} \in \mathbb{R}^{mN}$  can be designed to be equivalent with (1). Notice that the resulting optimization problem has no constraint on  $\mathbf{z}$ . Moreover, the cost functions on  $\mathbf{z}$  can be obtained by substituting (5, 6) into  $f_t(x_t)$  and  $g_t(u_t)$ , i.e.  $\tilde{f}_t(z_{t-p+1}, \dots, z_t) := f_t(x_t)$  and  $\tilde{g}_t(z_{t-p+1}, \dots, z_t, z_{t+1}) := g_t(u_t)$ . Correspondingly, the objective function of the equivalent optimization with respect to  $\mathbf{z}$  is

$$C(\mathbf{z}) := \sum_{t=0}^N \tilde{f}_t(z_{t-p+1}, \dots, z_t) + \sum_{t=0}^{N-1} \tilde{g}_t(z_{t-p+1}, \dots, z_{t+1}) \quad (7)$$

$C(\mathbf{z})$  has many nice properties, some of which are formally stated below.

**Lemma 1.** *The function  $C(\mathbf{z})$  has the following properties:*

- i)  $C(\mathbf{z})$  is  $\mu_c = \mu_f$  strongly convex and  $l_c$  smooth for  $l_c = pl_f + (p+1)l_g \|I_m, -A(\mathcal{I}, :)\|^2$ .
- ii) For any  $(\mathbf{x}, \mathbf{u})$  s.t.  $x_{t+1} = Ax_t + Bu_t$ ,  $C(\mathbf{z}) = J(\mathbf{x}, \mathbf{u})$  where  $\mathbf{z}$  is defined in (4). Conversely,  $\forall \mathbf{z}$ , the  $(\mathbf{x}, \mathbf{u})$  determined by (5,6) satisfies  $x_{t+1} = Ax_t + Bu_t$  and  $J(\mathbf{x}, \mathbf{u}) = C(\mathbf{z})$ ;
- iii) Each stage cost  $\tilde{f}_t + \tilde{g}_t$  in (7) only depends on  $z_{t-p+1}, \dots, z_{t+1}$ .

Property ii) implies that any online algorithm for deciding  $\mathbf{z}$  can be translated to an online algorithm for  $\mathbf{x}$  and  $\mathbf{u}$  by (5, 6) with the same costs. Property iii) highlights one nice property, finite temporal-coupling, of  $C(\mathbf{z})$ , which serves as a foundation for our online algorithm design.

**Example 2.** For illustration, consider the following dynamical system with  $n = 2$ ,  $m = 1$ :

$$\begin{bmatrix} x_{t+1}^1 \\ x_{t+1}^2 \end{bmatrix} = \begin{bmatrix} 0 & 1 \\ a_1 & a_2 \end{bmatrix} \begin{bmatrix} x_t^1 \\ x_t^2 \end{bmatrix} + \begin{bmatrix} 0 \\ 1 \end{bmatrix} u_t \quad (8)$$

Here,  $k_1 = 2$ ,  $\mathcal{I} = \{2\}$ ,  $A(\mathcal{I}, :) = (a_1, a_2)$ , and  $z_t = x_t^2$ . By (8),  $x_t^1 = x_{t-1}^2$  and  $x_t = (z_{t-1}, z_t)^\top$ . Similarly,  $u_t = x_{t+1}^2 - A(\mathcal{I}, :)x_t = z_{t+1} - A(\mathcal{I}, :)(z_{t-1}, z_t)^\top$ . Hence,  $\tilde{f}_t(z_{t-1}, z_t) = f_t(x_t) = f_t((z_{t-1}, z_t)^\top)$ ,  $\tilde{g}_t(z_{t-1}, z_t, z_{t+1}) = g_t(u_t) = g_t(z_{t+1} - A(\mathcal{I}, :)(z_{t-1}, z_t)^\top)$ .

**Remark 1.** This paper considers a reparameterization method with respect to states  $\mathbf{x}$  via the canonical form, and it might be interesting to compare it with the more direct reparameterization with respect to control inputs  $\mathbf{u}$ . The control-based reparameterization has been discussed in literature [54]. It has been observed in [54] that when  $A$  is not stable, the condition number of the cost function derived from the control-based reparameterization goes to infinity as  $W \rightarrow +\infty$ , which may result in computation issues when  $W$  is large. However, the state-based reparameterization considered in this paper can guarantee bounded condition number for all  $W$  even for unstable  $A$ , as shown in Lemma 1. This is one major advantage of the state-based reparameterization method considered in this paper.

### 3.2 Online algorithm design: RHGC

This section introduces our RHGC based on the reformulation (7) and inspired by [36]. As mentioned earlier, any online algorithm for  $z_t$  can be translated to an online algorithm for  $x_t, u_t$ . Hence, we will focus on designing an online algorithm for  $z_t$  in the following. By the finite temporal-coupling property of  $C(\mathbf{z})$ , the partial gradient of the total cost  $C(\mathbf{z})$  only depends on the finite neighboring stage costs  $\{\tilde{f}_\tau, \tilde{g}_\tau\}_{\tau=t}^{t+p-1}$  and finite neighboring stage variables  $(z_{t-p}, \dots, z_{t+p}) =: z_{t-p:t+p}$ .

$$\frac{\partial C}{\partial z_t}(\mathbf{z}) = \sum_{\tau=t}^{t+p-1} \frac{\partial \tilde{f}_\tau}{\partial z_t}(z_{\tau-p+1}, \dots, z_\tau) + \sum_{\tau=t-1}^{t+p-1} \frac{\partial \tilde{g}_\tau}{\partial z_t}(z_{\tau-p+1}, \dots, z_{\tau+1})$$

Without causing any confusion, we use  $\frac{\partial C}{\partial z_t}(z_{t-p:t+p})$  to denote  $\frac{\partial C}{\partial z_t}(\mathbf{z})$  for highlighting the local dependence. Thanks to the local dependence, despite the fact that not all the future costs are available, it is still possible to compute the partial gradient of the total cost by using only a finite lookahead window of the cost functions. This observation motivates the design of our receding horizon gradient-based control (RHGC) methods, which are the online implementation of gradient methods, such as vanilla gradient descent, Nesterov's accelerated gradient, triple momentum, etc., [38, 39].

---

#### Algorithm 1: Receding Horizon Gradient Descent (RHGD)

---

- 1: **inputs:** Canonical form  $(A, B)$ ,  $W \geq 1$ ,  $K = \lfloor \frac{W-1}{p} \rfloor$ , stepsize  $\gamma_g$ , initialization oracle  $\varphi$ .
  - 2: **for**  $t = 1 - W : N - 1$  **do**
  - 3:   *Step 1:* initialize  $z_{t+W}(0)$  by oracle  $\varphi$ .
  - 4:   **for**  $j = 1, \dots, K$  **do**
  - 5:     *Step 2:* update  $z_{t+W-jp}(j)$  by gradient descent  
 $z_{t+W-jp}(j) = z_{t+W-jp}(j-1) - \gamma_g \frac{\partial C}{\partial z_{t+W-jp}}(z_{t+W-(j+1)p:t+W-(j-1)p}(j-1))$ .
  - 6:   **end for**
  - 7:   *Step 3:* compute  $u_t$  by  $z_{t+1}(K)$  and the observed state  $x_t$ :  $u_t = z_{t+1}(K) - A(\mathcal{I}, :)x_t$
  - 8: **end for**
- 

Firstly, we illustrate the main idea of RHGC by receding horizon gradient descent (RHGD) based on vanilla gradient descent. In RHGD (Algorithm 1), index  $j$  refers to the iteration number of the

corresponding gradient update of  $C(\mathbf{z})$ . There are two major steps to decide  $z_t$ . Step 1 is initializing the decision variables  $\mathbf{z}(0)$ . Here, we do not restrict the initialization algorithm  $\varphi$  and allow any oracle/online algorithm without using lookahead information, i.e.  $z_{t+W}(0)$  is selected based only on the information up to  $t+W-1$ :  $z_{t+W}(0) = \varphi(\{\tilde{f}_s, \tilde{g}_s\}_{s=0}^{t+W-1})$ . One example of  $\varphi$  will be provided in Section 4. Step 2 is using the  $W$ -lookahead costs to conduct gradient updates. Notice that the gradient update from  $z_\tau(j-1)$  to  $z_\tau(j)$  is implemented in a backward order of  $\tau$ , i.e. from  $\tau = t+W$  to  $\tau = t$ . Moreover, since the partial gradient  $\frac{\partial C}{\partial z_t}$  requires the local decision variables  $z_{t-p:t+p}$ , given  $W$ -lookahead information, RHGD can only conduct  $K = \lfloor \frac{W-1}{p} \rfloor$  iterations of gradient descent for the total cost  $C(\mathbf{z})$ . For more discussion, we refer the reader to [36] for the  $p = 1$  case.

In addition to RHGD, RHGC can also incorporate accelerated gradient methods in the same way, such as Nesterov's accelerated gradient and triple momentum. For the space limit, we only formally present receding horizon triple momentum (RHTM) in Algorithm 2 based on triple momentum [39]. RHTM also consists of two major steps when determining  $z_t$ : initialization and gradient updates based on the lookahead window. The two major differences from RHGD are that the decision variables in RHTM include not only  $z(j)$  but also auxiliary variables  $\omega(j)$  and  $y(j)$ , which are adopted in triple momentum to accelerate the convergence, and that the gradient update is by triple momentum instead of gradient descent. Nevertheless, RHTM can also conduct  $K = \lfloor \frac{W-1}{p} \rfloor$  iterations of triple momentum for  $C(\mathbf{z})$  since the triple momentum update requires the same neighboring cost functions.

Though it appears that RHTM does not fully exploit the lookahead information since only a few gradient updates are used, in Section 5, we show that RHTM achieves near-optimal performance with respect to  $W$ , which means that RHTM successfully extracts and utilizes the prediction information.

Finally, we briefly introduce MPC[55] and suboptimal MPC[23], and compare them with our algorithms. MPC tries to solve a  $W$ -stage optimization at each  $t$  and implements the first control input. Suboptimal MPC, as a variant of MPC aiming at reducing computation, conducts an optimization method only for a few iterations without solving the optimization completely. Our algorithm's computation time is similar to that of suboptimal MPC with a few gradient iterations. However, the major difference between our algorithm and suboptimal MPC is that suboptimal MPC conducts gradient updates for a truncated  $W$ -stage optimal control problem based on  $W$ -lookahead information, while our algorithm is able to conduct gradient updates for the complete  $N$ -stage optimal control problem based on the same  $W$ -lookahead information by utilizing the reformulation (4, 5, 6, 7).

## 4 Regret upper bounds

Because our RHTM (RHGD) is designed to exactly implement the triple momentum (gradient descent) of  $C(\mathbf{z})$  for  $K$  iterations, it is straightforward to have the following regret guarantees that connect the regrets of RHTM and RHGD with the regret of the initialization oracle  $\varphi$ ,

---

### Algorithm 2: Receding Horizon Triple Momentum (RHTM)

---

**inputs:** Canonical form  $(A, B)$ ,  $W \geq 1$ ,  $K = \lfloor \frac{W-1}{p} \rfloor$ , stepsizes  $\gamma_c, \gamma_z, \gamma_\omega, \gamma_y > 0$ , oracle  $\varphi$ .  
**for**  $t = 1 - W : N - 1$  **do**  
    *Step 1:* initialize  $z_{t+W}(0)$  by oracle  $\varphi$ , then let  $\omega_{t+W}(-1), \omega_{t+W}(0), y_{t+W}(0)$  be  $z_{t+W}(0)$   
    **for**  $j = 1, \dots, K$  **do**  
        *Step 2:* update  $\omega_{t+W-jp}(j), y_{t+W-jp}(j), z_{t+W-jp}(j)$  by triple momentum.  

$$\begin{aligned} \omega_{t+W-jp}(j) &= (1 + \gamma_\omega)\omega_{t+W-jp}(j-1) - \gamma_\omega\omega_{t+W-jp}(j-2) \\ &\quad - \gamma_c \frac{\partial C}{\partial y_{t+W-jp}}(y_{t+W-(j+1)p:t+W-(j-1)p}(j-1)) \\ y_{t+W-jp}(j) &= (1 + \gamma_y)\omega_{t+W-jp}(j) - \gamma_y\omega_{t+W-jp}(j-1) \\ z_{t+W-jp}(j) &= (1 + \gamma_z)\omega_{t+W-jp}(j) - \gamma_z\omega_{t+W-jp}(j-1) \end{aligned}$$
  
    **end for**  
    *Step 3:* compute  $u_t$  by  $z_{t+1}(K)$  and the observed state  $x_t$ :  $u_t = z_{t+1}(K) - A(\mathcal{I}, :)x_t$   
**end for**

---

**Theorem 1.** Consider  $W \geq 1$  and stepsizes  $\gamma_g = \frac{1}{l_c}$ ,  $\gamma_c = \frac{1+\phi}{l_c}$ ,  $\gamma_\omega = \frac{\phi^2}{2-\phi}$ ,  $\gamma_y = \frac{\phi^2}{(1+\phi)(2-\phi)}$ ,  $\gamma_z = \frac{\phi^2}{1-\phi^2}$ ,  $\phi = 1 - 1/\sqrt{\zeta}$ , and let  $\zeta = l_c/\mu_c$  denote  $C(\mathbf{z})$ 's condition number. For any oracle  $\varphi$ ,

$$\text{Regret}(RHGD) \leq \zeta \left( \frac{\zeta - 1}{\zeta} \right)^K \text{Regret}(\varphi), \quad \text{Regret}(RHTM) \leq \zeta^2 \left( \frac{\sqrt{\zeta} - 1}{\sqrt{\zeta}} \right)^{2K} \text{Regret}(\varphi)$$

where  $K = \lfloor \frac{W-1}{p} \rfloor$ ,  $\text{Regret}(\varphi)$  is the regret of the initial controller:  $u_t(0) = z_{t+1}(0) - A(\mathcal{I}, :)x_t(0)$ .

Theorem 1 suggests that for any online algorithm  $\varphi$  without predictions, RHGD and RHTM can use predictions to lower the regret by a factor of  $\zeta(\frac{\zeta-1}{\zeta})^K$  and  $\zeta^2(\frac{\sqrt{\zeta}-1}{\sqrt{\zeta}})^{2K}$  respectively via additional  $K = \lfloor \frac{W-1}{p} \rfloor$  gradient updates. Moreover, the factors decay exponentially with  $K = \lfloor \frac{W-1}{p} \rfloor$ , and  $K$  almost linearly increases with  $W$ . This indicates that RHGD and RHTM improve the performance exponentially fast with an increase in the prediction window  $W$  for any initialization method. In addition,  $K = \lfloor \frac{W-1}{p} \rfloor$  decreases with  $p$ , implying that the regrets increase with the controllability index  $p$  (Definition 1). This is intuitive because  $p$  roughly indicates how fast the controller can influence the system state effectively: the larger the  $p$  is, the longer it takes. To see this, consider Example 2. Since  $u_{t-1}$  does not directly affect  $x_t^1$ , it takes at least  $p = 2$  steps to change  $x_t^1$  to a desirable value. Finally, RHTM's regret decays faster than RHGD's, which is intuitive because triple momentum converges faster than gradient descent. Thus, we will focus on RHTM in the following.

**An initialization method: follow the optimal steady state (FOSS).** To complete the regret analysis for RHTM, we provide a simple initialization method, FOSS, and its dynamic regret bound. As mentioned before, any online control algorithm without predictions, e.g. [42, 41], can be applied as an initialization oracle  $\varphi$ . However, most literature study static regrets rather than dynamic regrets.

**Definition 2** (Follow the optimal steady state (FOSS)). *The optimal steady state for stage cost  $f(x) + g(u)$  refers to  $(x^e, u^e) := \arg \min_{x=Au+Bu} (f(x) + g(u))$ .*

*Follow the optimal steady state algorithm (FOSS) first solves the optimal steady state  $(x_t^e, u_t^e)$  for cost  $f_t(x) + g_t(u)$ , then determines  $z_{t+1}$  by  $x_t^e$ , i.e.  $z_{t+1} = (x_t^{e,k_1}, \dots, x_t^{e,k_m})^\top$  at each  $t + 1$ .*

FOSS is motivated by the fact that the optimal steady state cost is the optimal infinite-horizon average cost for LTI systems with time-invariant cost functions [56], so FOSS should yield acceptable performance at least for slowly changing cost functions. Nevertheless, we admit that FOSS is proposed mainly for analytical purposes and other online algorithms may outperform FOSS in various perspectives. The following is a regret bound for FOSS, relying on the solution to Bellman equations.

**Definition 3** (Solution to the Bellman equations [57]). *Consider optimal control problem:  $\min \lim_{N \rightarrow +\infty} \frac{1}{N} \sum_{t=0}^{N-1} (f(x_t) + g(u_t))$  where  $x_{t+1} = Ax_t + Bu_t$ . Let  $\lambda^e$  be the optimal steady state cost  $f(x^e) + g(u^e)$ , which is also the optimal infinite-horizon average cost [56]. The Bellman equations for the problem is  $h^e(x) + \lambda^e = \min_u (f(x) + g(u) + h^e(Ax + Bu))$ . The solution to the Bellman equations, denoted by  $h^e(x)$ , is sometimes called as a bias function [57]. To ensure the uniqueness of the solution, some extra conditions, e.g.  $h^e(0) = 0$ , are usually imposed.*

**Theorem 2** (Regret bound of FOSS). *Let  $(x_t^e, u_t^e)$  and  $h_t^e(x)$  denote the optimal steady state and the bias function with respect to cost  $f_t(x) + g_t(u)$  respectively for  $0 \leq t \leq N - 1$ . Suppose  $h_t^e(x)$  exists for  $0 \leq t \leq N - 1$ ,<sup>4</sup> then the regret of FOSS can be bounded by*

$$\text{Regret}(FOSS) = O \left( \sum_{t=0}^N (\|x_{t-1}^e - x_t^e\| + h_{t-1}^e(x_t^*) - h_t^e(x_t^*)) \right),$$

where  $\{x_t^*\}_{t=0}^N$  denotes the optimal state trajectory for (1),  $x_{-1}^e = x_0^* = x_0 = 0$ ,  $h_{-1}^e(x) = 0$ ,  $h_N^e(x) = f_N(x)$ ,  $x_N^e = x_N$ . Consequently, by Theorem 1, the regret bound of RHTM with initialization FOSS is  $\text{Regret}(RHTM) = O \left( \zeta^2 \left( \frac{\sqrt{\zeta}-1}{\sqrt{\zeta}} \right)^{2K} \sum_{t=0}^N (\|x_{t-1}^e - x_t^e\| + h_{t-1}^e(x_t^*) - h_t^e(x_t^*)) \right)$ .

Theorem 2 bounds the regret by the variation of the optimal steady states  $x_t^e$  and the bias functions  $h_t^e$ . If  $f_t$  and  $g_t$  do not change,  $x_t^e$  and  $h_t^e$  do not change, yielding a small  $O(1)$  regret, i.e.  $O(\|x_0^e\| + h_0^e(x_0))$ , matching our intuition. Though Theorem 2 requires  $h_t^e$  exists, the existence is guaranteed for many control problems, e.g. LQ tracking and control problems with turnpike properties [58, 22].

<sup>4</sup> $h_t^e$  may not be unique, so extra conditions can be imposed on  $h_t^e$  for more interesting regret bounds.

## 5 Linear quadratic tracking: regret upper bounds and a fundamental limit

To provide more intuitive meaning for our regret analysis in Theorem 1 and Theorem 2, we apply RHTM to the LQ tracking problem in Example 1. Results for the time varying  $Q_t, R_t, \theta_t$  are provided in Appendix E; whereas here we focus on a special case which gives clean expressions for regret bounds: both an upper bound for RHTM with initialization FOSS and a lower bound for any online algorithm. Further, we show that the lower bound and the upper bound almost match each other, implying that our online algorithm RHTM uses the predictions in a nearly optimal way even though it only conducts a few gradient updates at each time step.

The special case of LQ tracking problems is in the following form,

$$\frac{1}{2} \sum_{t=0}^{N-1} [(x_t - \theta_t)^\top Q (x_t - \theta_t) + u_t^\top R u_t] + \frac{1}{2} x_N^\top P^e x_N, \quad (9)$$

where  $Q > 0, R > 0$ , and  $P^e$  is the solution to the algebraic Riccati equation with respect to  $Q, R$  [59]. Basically, in this special case,  $Q_t = Q, R_t = R$  for  $0 \leq t \leq N-1$ ,  $Q_N = P^e, \theta_N = 0$ , and only  $\theta_t$  changes for  $t = 0, 1, \dots, N-1$ . The LQ tracking problem (9) aims to follow a time-varying trajectory  $\{\theta_t\}$  with constant weights on the tracking cost and the control cost.

**Regret upper bound.** Firstly, based on Theorem 1 and Theorem 2, we have the following bound.

**Corollary 1.** *Under the stepsizes in Theorem 1, RHTM with FOSS as the initialization rule satisfies*

$$\text{Regret}(RHTM) = O\left(\zeta^2 \left(\frac{\sqrt{\zeta}-1}{\sqrt{\zeta}}\right)^{2K} \sum_{t=0}^N \|\theta_t - \theta_{t-1}\|\right)$$

where  $K = \lfloor (W-1)/p \rfloor$ ,  $\zeta$  is the condition number of the corresponding  $C(\mathbf{z})$ ,  $\theta_{-1} = 0$ .

This corollary shows that the regret can be bounded by the total variation of  $\theta_t$  for constant  $Q, R$ .

**Fundamental limit.** For any online algorithm, we have the following lower bound.

**Theorem 3 (Lower Bound).** *Consider  $1 \leq W \leq N/3$ , any condition number  $\zeta > 1$ , any variation budget  $4\bar{\theta} \leq L_N \leq (2N+1)\bar{\theta}$ , and any controllability index  $p \geq 1$ . For any online algorithm  $\mathcal{A}$ , there exists an LQ tracking problem in form (9) where i) the canonical-form system  $(A, B)$  has controllability index  $p$ , ii) the sequence  $\{\theta_t\}$  satisfies the variation budget  $\sum_{t=0}^N \|\theta_t - \theta_{t-1}\| \leq L_N$ , and iii) the corresponding  $C(\mathbf{z})$  has condition number  $\zeta$ , such that the following lower bound holds*

$$\text{Regret}(\mathcal{A}) = \Omega\left(\left(\frac{\sqrt{\zeta}-1}{\sqrt{\zeta}+1}\right)^{2K} L_N\right) = \Omega\left(\left(\frac{\sqrt{\zeta}-1}{\sqrt{\zeta}+1}\right)^{2K} \sum_{t=0}^N \|\theta_t - \theta_{t-1}\|\right) \quad (10)$$

where  $K = \lfloor (W-1)/p \rfloor$  and  $\theta_{-1} = 0$ .

Firstly, the lower bound in Theorem 3 almost matches the upper bound in Corollary 1, especially when  $\zeta$  is large, demonstrating that RHTM utilizes the predictions in a near-optimal way. The major conditions in Theorem 3 require that the prediction window is short compared with the horizon:  $W \leq N/3$ , and the variation of the cost functions should not be too small:  $L_N \geq 4\bar{\theta}$ , otherwise the online control problem is too easy and the regret can be very small. Moreover, the small gap between the regret bounds is conjectured to be nontrivial, because this gap coincides with the long lasting gap in the convergence rate of the first-order algorithms for strongly convex and smooth optimization. In particular, the lower bound in Theorem 3 matches the fundamental convergence limit in [38], and the upper bound is by triple momentum's convergence rate, which is the best one to our knowledge.

## 6 Numerical experiments

**LQ tracking problem in Example 1.** The system considered here has  $n = 2, m = 1$ , and  $p = 2$ . More details of the experiment settings are provided in Appendix H. We compare RHGC with a suboptimal MPC algorithm, fast gradient MPC (subMPC) [23]. Roughly speaking, subMPC solves the  $W$ -stage truncated optimal control from  $t$  to  $t+W-1$  by Nesterov's accelerated gradient [38], and one iteration of Nesterov's accelerated gradient requires  $2W$  gradient evaluations of stage

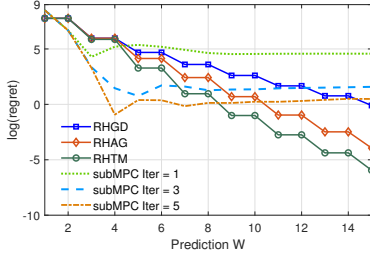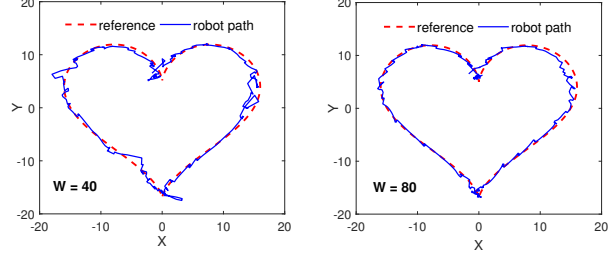

Figure 1: Regret for LQ tracking. Figure 2: Two-wheel robot tracking with nonlinear dynamics.

cost function since  $W$  stages are considered and each stage has two costs  $f_t$  and  $g_t$ . This implies that, in terms of the number of gradient evaluations, subMPC with one iteration corresponds to our RHTM because RHTM also requires roughly  $2W$  gradient evaluations per stage. Therefore, Figure 1 compares our RHGC algorithms with subMPC with one iteration. Figure 1 also plots subMPC with 3 and 5 iterations for more insights. Besides, Figure 1 plots not only RHGD and RHTM, but also RHAG, which is based on Nesterov’s accelerated gradient. Figure 1 shows that all our algorithms achieve exponential decaying regrets with respect to  $W$ , and the regrets are piecewise constant, matching Theorem 1. Further, it is observed that RHTM and RHAG perform better than RHGD, which is intuitive because triple momentum and Nesterov’s accelerated gradient are accelerated versions of gradient descent. In addition, our algorithms are much better than subMPC with 1 iteration, implying that our algorithms utilize the lookahead information more efficiently given similar computational time. Finally, subMPC achieves better performance by increasing the iteration number but the improvement saturates as  $W$  increases, in contrast to the steady improvement of RHGC.

**Path tracking for a two-wheel mobile robot.** Though we presented our online algorithms on an LTI system, our RHGC methods are applicable to some nonlinear systems as well. Here we consider a two-wheel mobile robot with nonlinear kinematic dynamics  $\dot{x} = v \cos \delta$ ,  $\dot{y} = v \sin \delta$ ,  $\dot{\delta} = w$  where  $(x, y)$  is the robot location,  $v$  and  $w$  are the tangential and angular velocities respectively,  $\delta$  denotes the tangent angle between  $v$  and the  $x$  axis [60]. The control is directly on the  $v$  and  $w$ , e.g., via the pulse-width modulation (PWM) of the motor [61]. Given a reference path  $(x_t^r, y_t^r)$ , the objective is to balance the tracking performance and the control cost, i.e.,  $\min \sum_{t=0}^N [c_t \cdot ((x_t - x_t^r)^2 + (y_t - y_t^r)^2) + c_t^v \cdot (v_t)^2 + c_t^w \cdot (w_t)^2]$ . We discretize the dynamics with time interval  $\Delta t = 0.025s$ ; then follow similar ideas in this paper to reformulate the optimal path tracking problem to an unconstrained optimization with respect to  $(x_t, y_t)$  and apply RHGC. See Appendix H for details. Figure 2 plots the tracking results with window  $W = 40$  and  $W = 80$  corresponding to lookahead time 1s and 2s. A video showing the dynamic processes with different  $W$  is provided at <https://youtu.be/fa156LTBD1s>. It is observed that the robot follows the reference trajectory well especially when the path is smooth but deviates a little more when the path has sharp turns, and a longer lookahead window leads to better tracking performance. These results confirm that our RHGC works effectively on nonlinear systems.

## 7 Conclusion

This paper studies the role of predictions on dynamic regrets of online control problems with linear dynamics. We design RHGC algorithms and provide regret upper bounds of two specific algorithms: RHGD and RHTM. We also provide a fundamental limit and show the fundamental limit almost matches RHTM’s upper bound. This paper leads to many interesting future directions, some of which are briefly discussed below. The first direction is to study more realistic prediction models which considers random prediction noises, e.g. [33, 35, 62]. The second direction is to consider unknown systems with process noises, possibly by applying learning-based control tools [44, 46, 48]. Further, more studies could be conducted on general control problems including nonlinear control and control with input and state constraints. Besides, it is interesting to consider other performance metrics, such as competitive ratio, since the dynamic regret is non-vanishing. Finally, other future directions include closing the gap of the regret bounds and more discussion on the effect of the canonical-form transformation on the condition number.

## Acknowledgement

This work was supported by NSF Career 1553407, ARPA-E NODES, AFOSR YIP and ONR YIP programs.

## References

- [1] Nevena Lazic, Craig Boutilier, Tyler Lu, Eehern Wong, Binz Roy, MK Ryu, and Greg Imwalle. Data center cooling using model-predictive control. In *Advances in Neural Information Processing Systems*, pages 3814–3823, 2018.
- [2] Wei Xu, Xiaoyun Zhu, Sharad Singhal, and Zhikui Wang. Predictive control for dynamic resource allocation in enterprise data centers. In *2006 IEEE/IFIP Network Operations and Management Symposium NOMS 2006*, pages 115–126. IEEE, 2006.
- [3] Tomas Baca, Daniel Hert, Giuseppe Loianno, Martin Saska, and Vijay Kumar. Model predictive trajectory tracking and collision avoidance for reliable outdoor deployment of unmanned aerial vehicles. In *2018 IEEE/RSJ International Conference on Intelligent Robots and Systems (IROS)*, pages 6753–6760. IEEE, 2018.
- [4] Jackeline Rios-Torres and Andreas A Malikopoulos. A survey on the coordination of connected and automated vehicles at intersections and merging at highway on-ramps. *IEEE Transactions on Intelligent Transportation Systems*, 18(5):1066–1077, 2016.
- [5] Kyoung-Dae Kim and Panganamala Ramana Kumar. An mpc-based approach to provable system-wide safety and liveness of autonomous ground traffic. *IEEE Transactions on Automatic Control*, 59(12):3341–3356, 2014.
- [6] Samir Kouro, Patricio Cortés, René Vargas, Ulrich Ammann, and José Rodríguez. Model predictive control—a simple and powerful method to control power converters. *IEEE Transactions on industrial electronics*, 56(6):1826–1838, 2008.
- [7] Edgar Perea-Lopez, B Erik Ydstie, and Ignacio E Grossmann. A model predictive control strategy for supply chain optimization. *Computers & Chemical Engineering*, 27(8-9):1201–1218, 2003.
- [8] Wenlin Wang, Daniel E Rivera, and Karl G Kempf. Model predictive control strategies for supply chain management in semiconductor manufacturing. *International Journal of Production Economics*, 107(1):56–77, 2007.
- [9] Moritz Diehl, Rishi Amrit, and James B Rawlings. A lyapunov function for economic optimizing model predictive control. *IEEE Transactions on Automatic Control*, 56(3):703–707, 2010.
- [10] Matthias A Müller and Frank Allgöwer. Economic and distributed model predictive control: Recent developments in optimization-based control. *SICE Journal of Control, Measurement, and System Integration*, 10(2):39–52, 2017.
- [11] Matthew Ellis, Helen Durand, and Panagiotis D Christofides. A tutorial review of economic model predictive control methods. *Journal of Process Control*, 24(8):1156–1178, 2014.
- [12] Antonio Ferramosca, James B Rawlings, Daniel Limón, and Eduardo F Camacho. Economic mpc for a changing economic criterion. In *49th IEEE Conference on Decision and Control (CDC)*, pages 6131–6136. IEEE, 2010.
- [13] Matthew Ellis and Panagiotis D Christofides. Economic model predictive control with time-varying objective function for nonlinear process systems. *AIChE Journal*, 60(2):507–519, 2014.
- [14] David Angeli, Alessandro Casavola, and Francesco Tedesco. Theoretical advances on economic model predictive control with time-varying costs. *Annual Reviews in Control*, 41:218–224, 2016.
- [15] Rishi Amrit, James B Rawlings, and David Angeli. Economic optimization using model predictive control with a terminal cost. *Annual Reviews in Control*, 35(2):178–186, 2011.
- [16] Lars Grüne. Economic receding horizon control without terminal constraints. *Automatica*, 49(3):725–734, 2013.

- [17] David Angeli, Rishi Amrit, and James B Rawlings. On average performance and stability of economic model predictive control. *IEEE transactions on automatic control*, 57(7):1615–1626, 2012.
- [18] Lars Grüne and Marleen Stieler. Asymptotic stability and transient optimality of economic mpc without terminal conditions. *Journal of Process Control*, 24(8):1187–1196, 2014.
- [19] Lars Grüne and Anastasia Panin. On non-averaged performance of economic mpc with terminal conditions. In *2015 54th IEEE Conference on Decision and Control (CDC)*, pages 4332–4337. IEEE, 2015.
- [20] Antonio Ferramosca, Daniel Limon, and Eduardo F Camacho. Economic mpc for a changing economic criterion for linear systems. *IEEE Transactions on Automatic Control*, 59(10):2657–2667, 2014.
- [21] Lars Grüne and Simon Pirkelmann. Closed-loop performance analysis for economic model predictive control of time-varying systems. In *2017 IEEE 56th Annual Conference on Decision and Control (CDC)*, pages 5563–5569. IEEE, 2017.
- [22] Lars Grüne and Simon Pirkelmann. Economic model predictive control for time-varying system: Performance and stability results. *Optimal Control Applications and Methods*, 2018.
- [23] Melanie Nicole Zeilinger, Colin Neil Jones, and Manfred Morari. Real-time suboptimal model predictive control using a combination of explicit mpc and online optimization. *IEEE Transactions on Automatic Control*, 56(7):1524–1534, 2011.
- [24] Yang Wang and Stephen Boyd. Fast model predictive control using online optimization. *IEEE Transactions on Control Systems Technology*, 18(2):267–278, 2010.
- [25] Knut Graichen and Andreas Kugi. Stability and incremental improvement of suboptimal mpc without terminal constraints. *IEEE Transactions on Automatic Control*, 55(11):2576–2580, 2010.
- [26] Douglas A Allan, Cuyler N Bates, Michael J Risbeck, and James B Rawlings. On the inherent robustness of optimal and suboptimal nonlinear mpc. *Systems & Control Letters*, 106:68–78, 2017.
- [27] E. Hazan. *Introduction to Online Convex Optimization*. Foundations and Trends(r) in Optimization Series. Now Publishers, 2016.
- [28] S. Shalev-Shwartz. *Online Learning and Online Convex Optimization*. Foundations and Trends(r) in Machine Learning. Now Publishers, 2012.
- [29] Ali Jadbabaie, Alexander Rakhlin, Shahin Shahrampour, and Karthik Sridharan. Online optimization: Competing with dynamic comparators. In *Artificial Intelligence and Statistics*, pages 398–406, 2015.
- [30] Minghong Lin, Adam Wierman, Lachlan LH Andrew, and Eno Thereska. Dynamic right-sizing for power-proportional data centers. *IEEE/ACM Transactions on Networking (TON)*, 21(5):1378–1391, 2013.
- [31] Minghong Lin, Zhenhua Liu, Adam Wierman, and Lachlan LH Andrew. Online algorithms for geographical load balancing. In *Green Computing Conference (IGCC), 2012 International*, pages 1–10. IEEE, 2012.
- [32] Alexander Rakhlin and Karthik Sridharan. Online learning with predictable sequences. In *Conference on Learning Theory*, pages 993–1019, 2013.
- [33] Niangjun Chen, Anish Agarwal, Adam Wierman, Siddharth Barman, and Lachlan LH Andrew. Online convex optimization using predictions. In *ACM SIGMETRICS Performance Evaluation Review*, volume 43, pages 191–204. ACM, 2015.
- [34] Masoud Badieli, Na Li, and Adam Wierman. Online convex optimization with ramp constraints. In *Decision and Control (CDC), 2015 IEEE 54th Annual Conference on*, pages 6730–6736. IEEE, 2015.
- [35] Niangjun Chen, Joshua Comden, Zhenhua Liu, Anshul Gandhi, and Adam Wierman. Using predictions in online optimization: Looking forward with an eye on the past. In *Proceedings of the 2016 ACM SIGMETRICS International Conference on Measurement and Modeling of Computer Science*, pages 193–206. ACM, 2016.

- [36] Yingying Li, Guannan Qu, and Na Li. Online optimization with predictions and switching costs: Fast algorithms and the fundamental limit. *arXiv preprint arXiv:1801.07780*, 2018.
- [37] Gautam Goel and Adam Wierman. An online algorithm for smoothed regression and lqr control. In *The 22nd International Conference on Artificial Intelligence and Statistics*, pages 2504–2513, 2019.
- [38] Yurii Nesterov. *Introductory lectures on convex optimization: A basic course*, volume 87. Springer Science & Business Media, 2013.
- [39] Bryan Van Scoy, Randy A Freeman, and Kevin M Lynch. The fastest known globally convergent first-order method for minimizing strongly convex functions. *IEEE Control Systems Letters*, 2(1):49–54, 2017.
- [40] David Luenberger. Canonical forms for linear multivariable systems. *IEEE Transactions on Automatic Control*, 12(3):290–293, 1967.
- [41] Yasin Abbasi-Yadkori, Peter Bartlett, and Varun Kanade. Tracking adversarial targets. In *International Conference on Machine Learning*, pages 369–377, 2014.
- [42] Alon Cohen, Avinatan Hasidim, Tomer Koren, Nevena Lazic, Yishay Mansour, and Kunal Talwar. Online linear quadratic control. In *International Conference on Machine Learning*, pages 1028–1037, 2018.
- [43] Naman Agarwal, Brian Bullins, Elad Hazan, Sham Kakade, and Karan Singh. Online control with adversarial disturbances. In *International Conference on Machine Learning*, pages 111–119, 2019.
- [44] Sarah Dean, Horia Mania, Nikolai Matni, Benjamin Recht, and Stephen Tu. On the sample complexity of the linear quadratic regulator. *arXiv preprint arXiv:1710.01688*, 2017.
- [45] Sarah Dean, Horia Mania, Nikolai Matni, Benjamin Recht, and Stephen Tu. Regret bounds for robust adaptive control of the linear quadratic regulator. In *Advances in Neural Information Processing Systems*, pages 4188–4197, 2018.
- [46] Stephen Tu and Benjamin Recht. Least-squares temporal difference learning for the linear quadratic regulator. *arXiv preprint arXiv:1712.08642*, 2017.
- [47] Kyriakos G Vamvoudakis and Frank L Lewis. Online actor–critic algorithm to solve the continuous-time infinite horizon optimal control problem. *Automatica*, 46(5):878–888, 2010.
- [48] Yi Ouyang, Mukul Gagrani, and Rahul Jain. Learning-based control of unknown linear systems with thompson sampling. *arXiv preprint arXiv:1709.04047*, 2017.
- [49] Lian Lu, Jinlong Tu, Chi-Kin Chau, Minghua Chen, and Xiaojun Lin. *Online energy generation scheduling for microgrids with intermittent energy sources and co-generation*, volume 41. ACM, 2013.
- [50] Allan Borodin, Nathan Linial, and Michael E Saks. An optimal on-line algorithm for metrical task system. *Journal of the ACM (JACM)*, 39(4):745–763, 1992.
- [51] Aryan Mokhtari, Shahin Shahrampour, Ali Jadbabaie, and Alejandro Ribeiro. Online optimization in dynamic environments: Improved regret rates for strongly convex problems. In *2016 IEEE 55th Conference on Decision and Control (CDC)*, pages 7195–7201. IEEE, 2016.
- [52] Lachlan Andrew, Siddharth Barman, Katrina Ligett, Minghong Lin, Adam Meyerson, Alan Roytman, and Adam Wierman. A tale of two metrics: Simultaneous bounds on competitiveness and regret. In *Conference on Learning Theory*, pages 741–763, 2013.
- [53] Joao P Hespanha. *Linear systems theory*. Princeton university press, 2018.
- [54] Stefan Richter, Colin Neil Jones, and Manfred Morari. Computational complexity certification for real-time mpc with input constraints based on the fast gradient method. *IEEE Transactions on Automatic Control*, 57(6):1391–1403, 2011.
- [55] JB Rawlings and DQ Mayne. Postface to model predictive control: Theory and design. *Nob Hill Pub*, pages 155–158, 2012.
- [56] David Angeli, Rishi Amrit, and James B Rawlings. Receding horizon cost optimization for overly constrained nonlinear plants. In *Proceedings of the 48th IEEE Conference on Decision and Control (CDC) held jointly with 2009 28th Chinese Control Conference*, pages 7972–7977. IEEE, 2009.

- [57] Martin L Puterman. *Markov decision processes: discrete stochastic dynamic programming*. John Wiley & Sons, 2014.
- [58] Tobias Damm, Lars Grüne, Marleen Stieler, and Karl Worthmann. An exponential turnpike theorem for dissipative discrete time optimal control problems. *SIAM Journal on Control and Optimization*, 52(3):1935–1957, 2014.
- [59] Dimitri P Bertsekas. *Dynamic programming and optimal control*, volume 1. 2011.
- [60] Gregor Klancar, Drago Matko, and Saso Blazic. Mobile robot control on a reference path. In *Proceedings of the 2005 IEEE International Symposium on, Mediterrean Conference on Control and Automation Intelligent Control, 2005.*, pages 1343–1348. IEEE, 2005.
- [61] Pololu Corporation. *Pololu m3pi User’s Guide*. Available at <https://www.pololu.com/docs/pdf/0J48/m3pi.pdf>.
- [62] Heejung Bang and James M Robins. Doubly robust estimation in missing data and causal inference models. *Biometrics*, 61(4):962–973, 2005.
- [63] Paul Concus, Gene H Golub, and Gérard Meurant. Block preconditioning for the conjugate gradient method. *SIAM Journal on Scientific and Statistical Computing*, 6(1):220–252, 1985.
- [64] Mishael Zedek. Continuity and location of zeros of linear combinations of polynomials. *Proceedings of the American Mathematical Society*, 16(1):78–84, 1965.

## Appendices

In Appendix A, we will discuss the canonical-form transformation. In Appendix B, we will briefly introduce the triple momentum algorithm proposed in [39] and provide the proof of Theorem 1. In Appendix C, we will provide the proof of Lemma 1. In Appendix D, we will present the proof of Theorem 2. Appendix E provides a proof of Corollary 1 and regret analysis for more general linear quadratic tracking problems. Appendix F provides a proof of Theorem 3. In Appendix G, we will provide the proofs of the technical lemmas used in Appendix E. In Appendix H, we will provide a more detailed description of our numerical experiments.

### A Canonical form

In this section, we introduce the linear transformation from a general LTI system to a canonical-form LTI system, and then discuss how to convert a general online optimal control problem to an online optimal control problem with a canonical-form system.

Firstly, consider a general LTI system:  $x_{t+1} = Ax_t + Bu_t$  and two invertible matrices  $S_x \in \mathbb{R}^n, S_u \in \mathbb{R}^m$ . Under the linear transformation on state and control:  $\hat{x}_t = S_x x_t, \hat{u}_t = S_u u_t$ , the equivalent LTI system with respect to the new state  $\hat{x}_t$  and the new control  $\hat{u}_t$  is

$$\hat{x}_{t+1} = S_x A S_x^{-1} \hat{x}_t + S_x B S_u^{-1} \hat{u}_t$$

By [40, Theorem 1], for any controllable  $(A, B)$ , there exist  $S_x, S_u$  such that  $\hat{A} = S_x A S_x^{-1}$  and  $\hat{B} = S_x B S_u^{-1}$  are in the canonical form defined in Definition 1. The computation method of  $S_x, S_u$  is also provided in [40].

In an online optimal control problem, since  $A, B$  are known as priors,  $S_x, S_u$  can be computed offline. When stage cost functions  $f_t(x_t), g_t(u_t)$  are received online, the new cost functions  $\hat{f}_t(\hat{x}_t), \hat{g}_t(\hat{u}_t)$  for the canonical-form system can be computed online by applying  $S_x, S_u$ :

$$\hat{f}_t(\hat{x}_t) = f_t(x_t) = f_t(S_x^{-1} \hat{x}_t), \quad \hat{g}_t(\hat{u}_t) = g_t(u_t) = g_t(S_u^{-1} \hat{u}_t)$$

Moreover, it is straightforward to verify that  $\hat{f}_t(\hat{x}_t)$  and  $\hat{g}_t(\hat{u}_t)$  still satisfy Assumption 2 and 3, just with perhaps different parameters. For example,  $\hat{f}_t(\hat{x}_t)$  is  $\mu_f / \|S_x\|^2$  strongly convex and  $l_f \|S_x^{-1}\|^2$  smooth and  $\hat{g}_t(\hat{u}_t)$  is convex and  $l_g \|S_u^{-1}\|^2$  smooth. Therefore, it is without loss of generality to only consider online optimal control with canonical-form systems.

### B Triple momentum and a proof of Theorem 1

Triple Momentum (TM) is an accelerated version of gradient descent proposed in [39]. When optimizing an unconstrained optimization  $\min_{\mathbf{z}} C(\mathbf{z})$ , at each iteration  $j \geq 0$ , TM conducts

$$\begin{aligned} \boldsymbol{\omega}(j+1) &= (1 + \delta_\omega) \boldsymbol{\omega}(j) - \delta_\omega \boldsymbol{\omega}(j-1) - \delta_c \nabla C(\mathbf{y}(j)) \\ \mathbf{y}(j+1) &= (1 + \delta_y) \boldsymbol{\omega}(j+1) - \delta_y \boldsymbol{\omega}(j) \\ \mathbf{z}(j+1) &= (1 + \delta_z) \boldsymbol{\omega}(j+1) - \delta_z \boldsymbol{\omega}(j) \end{aligned}$$

where  $\boldsymbol{\omega}(j), \mathbf{y}(j)$  are auxiliary variables to accelerate the convergence,  $\mathbf{z}(j)$  is the decision variable,  $\boldsymbol{\omega}(0) = \boldsymbol{\omega}(-1) = \mathbf{z}(0) = \mathbf{y}(0)$  are given initial values.

Suppose  $\mathbf{z} = (z_1^\top, \dots, z_N^\top)^\top$ . Zooming in to each coordinate  $z_t$ , the update of  $z_t(j)$  by TM is provided below

$$\begin{aligned} \omega_t(j+1) &= (1 + \delta_\omega) \omega_t(j) - \delta_\omega \omega_t(j-1) - \delta_c \frac{\partial C}{\partial y_t}(\mathbf{y}(j)) \\ y_t(j+1) &= (1 + \delta_y) \omega_t(j+1) - \delta_y \omega_t(j) \\ z_t(j+1) &= (1 + \delta_z) \omega_t(j+1) - \delta_z \omega_t(j) \end{aligned}$$

By Section 3,  $\frac{\partial C}{\partial y_t}(\mathbf{y}(j))$  only depends on stage cost functions and stage variables across a finite neighboring stages, allowing the online implementation in Algorithm 2 based on the finite-lookahead window.

TM enjoys a faster convergence rate than the gradient descent for  $\mu_c$  strongly convex and  $l_c$  smooth functions under proper step sizes. In particular, when  $\gamma_c = \frac{1+\phi}{l_c}$ ,  $\gamma_w = \frac{\phi^2}{2-\phi}$ ,  $\gamma_y = \frac{\phi^2}{(1+\phi)(2-\phi)}$ ,  $\gamma_z = \frac{\phi^2}{1-\phi^2}$ , and  $\phi = 1 - 1/\sqrt{\zeta}$ ,  $\zeta = l_c/\mu_c$ , by [39, Theorem 1], the convergence of TM satisfies:

$$C(\mathbf{z}(j)) - C(\mathbf{z}^*) \leq \left(\frac{\sqrt{\zeta}-1}{\sqrt{\zeta}}\right)^{2j} \frac{l_c \zeta}{2} \|\mathbf{z}(0) - \mathbf{z}^*\|^2 \leq \zeta^2 \left(\frac{\sqrt{\zeta}-1}{\sqrt{\zeta}}\right)^{2j} (C(\mathbf{z}(0)) - C(\mathbf{z}^*)) \quad (11)$$

In the following, we will apply this result to prove Theorem 1.

### B.1 Proof of Theorem 1

By comparing TM with RHTM, it can be verified that  $z_{t+1}(K)$  computed by RHTM is the same as  $z_{t+1}(K)$  computed by the triple momentum after  $K$  iterations. Moreover, according to the equivalence between the optimization  $\min_{\mathbf{z}} C(\mathbf{z})$  and the optimal control  $J(\mathbf{x}, \mathbf{u})$  in Lemma 1,

$$J(RHTM) = C(\mathbf{z}(K)), \quad J(\varphi) = C(\mathbf{z}(0)), \quad J^* = C(\mathbf{z}^*)$$

Finally, by utilizing (11), the bound on  $\text{Regret}(RHTM)$  is straightforward.

The regret of RHGD can be proved in the same way.

### C Proof of Lemma 1

Property ii) and iii) can be directly verified by definition. Thus, it suffices to prove i): the strong convexity and smoothness of  $C(\mathbf{z})$ .

Notice that  $x_t, u_t$  are linear with respect to  $\mathbf{z}$  by (5) (6). For ease of reference, we define matrix  $M^{x_t}, M^{u_t}$  to represent the relation between  $x_t, u_t$  and  $\mathbf{z}$ , i.e.,  $x_t = M^{x_t} \mathbf{z}$  and  $u_t = M^{u_t} \mathbf{z}$ . Similarly, we write  $\tilde{f}_t(z_{t-p+1}, \dots, z_t)$  and  $\tilde{g}_t(z_{t-p+1}, \dots, z_{t+1})$  in terms of  $\mathbf{z}$  for simplicity of notation:

$$\begin{aligned} \tilde{f}_t(z_{t-p+1}, \dots, z_t) &= \tilde{f}_t(\mathbf{z}) = f_t(M^{x_t} \mathbf{z}) \\ \tilde{g}_t(z_{t-p+1}, \dots, z_{t+1}) &= \tilde{g}_t(\mathbf{z}) = g_t(M^{u_t} \mathbf{z}) \end{aligned}$$

A direct consequence of the linear relations is that  $\tilde{f}_t(\mathbf{z})$  and  $\tilde{g}_t(\mathbf{z})$  are convex with respect to  $\mathbf{z}$  because  $f_t(x_t), g_t(u_t)$  are convex and the linear transformation preserves convexity.

In the following, we will focus on the proof of strong convexity and smoothness. For simplicity, in the following, we only consider cost function  $f_t, g_t$  with minimum values zero:  $f_t(\theta_t) = 0$ , and  $g_t(\xi_t) = 0$  for all  $t$ . This is without loss of generality because by strong convexity and smoothness,  $f_t, g_t$  have minimum values, and by subtracting the minimum value, we can let  $f_t, g_t$  have minimum value 0.

**Strong convexity.** Since  $\tilde{g}_t$  is convex, we only need to prove that  $\sum_t \tilde{f}_t(\mathbf{z})$  is strongly convex then the sum  $C(\mathbf{z})$  is strongly convex because the sum of convex functions and a strongly convex function is strongly convex.

In particular, by the strong convexity of  $f_t(x_t)$ , we have the following result: for any  $\mathbf{z}, \mathbf{z}' \in \mathbb{R}^{Nm}$  and  $x_t = M^{x_t} \mathbf{z}, x'_t = M^{x_t} \mathbf{z}'$ :

$$\begin{aligned} \tilde{f}_t(\mathbf{z}') - \tilde{f}_t(\mathbf{z}) - \langle \nabla \tilde{f}_t(\mathbf{z}), \mathbf{z}' - \mathbf{z} \rangle &= \frac{\mu_f}{2} \|z'_t - z_t\|^2 \\ &= \tilde{f}_t(\mathbf{z}') - \tilde{f}_t(\mathbf{z}) - \langle (M^{x_t})^\top \nabla f_t(x_t), \mathbf{z}' - \mathbf{z} \rangle - \frac{\mu_f}{2} \|z'_t - z_t\|^2 \\ &= \tilde{f}_t(\mathbf{z}') - \tilde{f}_t(\mathbf{z}) - \langle \nabla f_t(x_t), M^{x_t}(\mathbf{z}' - \mathbf{z}) \rangle - \frac{\mu_f}{2} \|z'_t - z_t\|^2 \\ &= \tilde{f}_t(\mathbf{z}') - \tilde{f}_t(\mathbf{z}) - \langle \nabla f_t(x_t), x'_t - x_t \rangle - \frac{\mu_f}{2} \|z'_t - z_t\|^2 \\ &\geq f_t(x'_t) - f_t(x_t) - \langle \nabla f_t(x_t), x'_t - x_t \rangle - \frac{\mu_f}{2} \|x'_t - x_t\|^2 \geq 0 \end{aligned}$$

where the first equality is by the chain rule, the second equality is by the definition of inner product, the third equality is by the definition of  $x_t, x'_t$ , the first inequality is by  $\tilde{f}_t(\mathbf{z}) = f_t(x)$  and  $z_t = (x_t^{k_1}, \dots, x_t^{k_m})^\top$ , and the last inequality is because  $f_t(x_t)$  is  $\mu_f$  strongly convex.

Summing over  $t$  on both sides of the inequality results in the strong convexity of  $\sum_t \tilde{f}_t(\mathbf{z})$ :

$$\begin{aligned} & \sum_{t=1}^N \left[ \tilde{f}_t(\mathbf{z}') - \tilde{f}_t(\mathbf{z}) - \langle \nabla \tilde{f}_t(\mathbf{z}), \mathbf{z}' - \mathbf{z} \rangle - \frac{\mu_f}{2} \|z'_t - z_t\|^2 \right] \\ &= \sum_{t=1}^N \tilde{f}_t(\mathbf{z}') - \sum_{t=1}^N \tilde{f}_t(\mathbf{z}) - \langle \nabla \sum_{t=1}^N \tilde{f}_t(\mathbf{z}), \mathbf{z}' - \mathbf{z} \rangle - \frac{\mu_f}{2} \|\mathbf{z}' - \mathbf{z}\|^2 \geq 0 \end{aligned}$$

Consequently,  $C(\mathbf{z})$  is strongly convex with parameter at least  $\mu_f$  by the convexity of  $\tilde{g}_t$ .

**Smoothness.** We will prove the smoothness by considering  $\tilde{f}_t(\mathbf{z})$  and  $\tilde{g}_t(\mathbf{z})$  respectively.

Firstly, let's consider  $\tilde{f}_t(\mathbf{z})$ . Similar to the proof for strong convexity, we use the smoothness of  $f_t(x_t)$ . For any  $\mathbf{z}, \mathbf{z}'$ , and  $x_t = M^{x_t} \mathbf{z}$ ,  $x'_t = M^{x_t} \mathbf{z}'$ , we can show that

$$\begin{aligned} \tilde{f}_t(\mathbf{z}') &= f_t(x'_t) \leq f_t(x_t) + \langle \nabla f_t(x_t), x'_t - x_t \rangle + \frac{l_f}{2} \|x'_t - x_t\|^2 \\ &\leq \tilde{f}_t(\mathbf{z}) + \langle \nabla \tilde{f}_t(\mathbf{z}), \mathbf{z}' - \mathbf{z} \rangle + \frac{l_f}{2} (\|z'_{t-p+1} - z_{t-p+1}\|^2 + \dots + \|z'_t - z_t\|^2) \end{aligned}$$

where the second inequality is by  $x_t = M^{x_t} \mathbf{z}$  and the chain rule and (5).

Secondly, we consider  $\tilde{g}_t(\mathbf{z})$  in a similar way. For any  $\mathbf{z}, \mathbf{z}'$ , and  $u_t = M^{u_t} \mathbf{z}$ ,  $u'_t = M^{u_t} \mathbf{z}'$ , we have

$$\begin{aligned} \tilde{g}_t(\mathbf{z}') &= g_t(u'_t) \leq g_t(u_t) + \langle \nabla g_t(u_t), u'_t - u_t \rangle + \frac{l_g}{2} \|u'_t - u_t\|^2 \\ &= \tilde{g}_t(\mathbf{z}) + \langle (M^{u_t})^\top \nabla g_t(u_t), \mathbf{z}' - \mathbf{z} \rangle + \frac{l_g}{2} \|u'_t - u_t\|^2 \\ &= \tilde{g}_t(\mathbf{z}) + \langle \nabla \tilde{g}_t(\mathbf{z}), \mathbf{z}' - \mathbf{z} \rangle + \frac{l_g}{2} \|u'_t - u_t\|^2 \end{aligned}$$

Since  $u_t = z_{t+1} - A(\mathcal{I}, : )x_t = [I_m, -A(\mathcal{I}, : )](z_{t+1}^\top, x_t^\top)^\top$ , we have that

$$\begin{aligned} \frac{l_g}{2} \|u'_t - u_t\|^2 &\leq \frac{l_g}{2} \|[I_m, -A(\mathcal{I}, : )] [((z'_{t+1})^\top, (x'_t)^\top)^\top - (z_{t+1}^\top, x_t^\top)^\top]\|^2 \\ &\leq \frac{l_g}{2} \|[I_m, -A(\mathcal{I}, : )]\|^2 (\|z_{t+1} - z'_{t+1}\|^2 + \|x_t - x'_t\|^2) \\ &\leq \frac{l_g}{2} \|[I_m, -A(\mathcal{I}, : )]\|^2 (\|z_{t+1} - z'_{t+1}\|^2 + \dots + \|z_{t-p+1} - z'_{t-p+1}\|^2) \end{aligned}$$

Finally, by summing  $\tilde{f}_t(\mathbf{z}')$ ,  $\tilde{g}_t(\mathbf{z}')$ 's inequalities above over all  $t$ , we have

$$C(\mathbf{z}') \leq C(\mathbf{z}) + \langle \nabla C(\mathbf{z}), \mathbf{z}' - \mathbf{z} \rangle + (pl_f + (p+1)l_g \|[I_m, -A(\mathcal{I}, : )]\|^2)/2 \|\mathbf{z}' - \mathbf{z}\|^2$$

Thus, we have proved the smoothness of  $C(\mathbf{z})$ .

## D Proof of Theorem 2

Remember that  $\text{Regret}(FOSS) = J(FOSS) - J^*$ . To bound the regret, we let the sum of the optimal steady state costs,  $\sum_{t=0}^{N-1} \lambda_t^e$ , be a middle ground and bound  $J(FOSS) - \sum_{t=0}^{N-1} \lambda_t^e$  and  $\sum_{t=0}^{N-1} \lambda_t^e - J^*$  in Lemma 2 and Lemma 3 respectively. Then, the regret bound can be obtained by combining the two bounds.

**Lemma 2** (Bound on  $J(FOSS) - \sum_{t=0}^{N-1} \lambda_t^e$ ). *Let  $x_t(0)$  denote the state determined by FOSS.*

$$J(FOSS) - \sum_{t=0}^{N-1} \lambda_t^e \leq c_1 \sum_{t=0}^{N-1} \|x_t^e - x_{t-1}^e\| + f_N(x_N(0)) = O\left(\sum_{t=0}^N \|x_t^e - x_{t-1}^e\|\right)$$

where we define  $x_N^e := \delta_N$ ,  $x_{-1}^e := x_0 = 0$  for simplicity of notation,  $c_1$  is a constant that does not depend on  $N, W$  and big  $O$  hides a constant that does not depend on  $N, W$ .

**Lemma 3** (Bound on  $\sum_{t=0}^{N-1} \lambda_t^e - J^*$ ). *Let  $h_t^e(x)$  denote a solution to the Bellman equations under cost  $f_t(x) + g_t(u)$ . Let  $\{x_t^*\}$  denote the optimal state trajectory to the offline optimal control (1).*

$$\sum_{t=0}^{N-1} \lambda_t^e - J^* \leq \sum_{t=1}^N (h_{t-1}^e(x_t^*) - h_t^e(x_t^*)) - h_0^e(x_0) = \sum_{t=0}^N (h_{t-1}^e(x_t^*) - h_t^e(x_t^*))$$

where we define  $h_N^e(x) := f_N(x)$ ,  $h_{-1}^e(x) := 0$  and  $x_0^* := x_0$  for simplicity of notation.

Then, we can complete the proof by applying Lemma 2 and 3:

$$\begin{aligned} J(\text{FOSS}) - J^* &= J(\text{FOSS}) - \sum_{t=0}^{N-1} \lambda_t^e + \sum_{t=0}^{N-1} \lambda_t^e - J^* \\ &= O\left(\sum_{t=0}^N (\|x_{t-1}^e - x_t^e\| + h_{t-1}^e(x_t^*) - h_t^e(x_t^*))\right) \end{aligned}$$

In the following, we will prove Lemma 2 and 3 respectively. For simplicity, we only consider cost function  $f_t, g_t$  with minimum values zero:  $f_t(\theta_t) = 0$ , and  $g_t(\xi_t) = 0$  for all  $t$ . There is no loss of generality because by strong convexity and smoothness,  $f_t, g_t$  have minimum values, and by subtracting the minimum value, we can let  $f_t, g_t$  have minimum value 0.

#### D.1 Proof of Lemma 2.

Notice that  $J(\text{FOSS}) = \sum_{t=0}^{N-1} (f_t(x_t(0)) + g_t(u_t(0))) + f_N(x_N(0))$  and  $\sum_{t=0}^{N-1} \lambda_t^e = \sum_{t=0}^{N-1} (f_t(x_t^e) + g_t(u_t^e))$ . Thus, it suffices to bound  $f_t(x_t(0)) - f_t(x_t^e)$  and  $g_t(u_t(0)) - g_t(u_t^e)$  for  $0 \leq t \leq N-1$ . We will first focus on  $f_t(x_t(0)) - f_t(x_t^e)$ , then bound  $g_t(u_t(0)) - g_t(u_t^e)$  in the same way.

For  $0 \leq t \leq N-1$ , by the convexity of  $f_t$ , and the property of  $L_2$  norm,

$$f_t(x_t(0)) - f_t(x_t^e) \leq \langle \nabla f_t(x_t(0)), x_t(0) - x_t^e \rangle \leq \|\nabla f_t(x_t(0))\| \|x_t(0) - x_t^e\| \quad (12)$$

In the following, we will bound  $\|\nabla f_t(x_t(0))\|$  and  $\|x_t(0) - x_t^e\|$  respectively.

Firstly, we provide a bound on  $\|\nabla f_t(x_t(0))\|$ :

$$\|\nabla f_t(x_t(0))\| = \|\nabla f_t(x_t(0)) - \nabla f_t(\theta_t)\| \leq l_f \|x_t(0) - \theta_t\| \leq l_f (\sqrt{n} \bar{x}^e + \bar{\theta}) \quad (13)$$

where the first equality is because  $\theta_t$  is the global minimizer of  $f_t$ , and first inequality is by Lipschitz smoothness, the second inequality is by  $\|\theta_t\| \leq \bar{\theta}$  according to Assumption 3 and by  $\|x_t(0)\| \leq \sqrt{n} \bar{x}^e$  proved in the following lemma.

**Lemma 4** (Uniform upper bounds on  $x_t^e, u_t^e, x_t(0), u_t(0)$ ). *There exist  $\bar{x}^e$  and  $\bar{u}^e$  that are independent of  $N, W$ , such that  $\|x_t^e\| \leq \bar{x}^e$  and  $\|u_t^e\| \leq \bar{u}^e$  for all  $0 \leq t \leq N-1$ . Moreover,  $\|x_t(0)\| \leq \sqrt{n} \bar{x}^e$  for  $0 \leq t \leq N$  and  $\|u_t(0)\| \leq \sqrt{n} \bar{u}^e$  for  $0 \leq t \leq N-1$ , where  $x_t(0), u_t(0)$  denote the state and control at  $t$  determined by FOSS.*

The proof is technical and is deferred to Appendix D.3.

Secondly, we provide a bound on  $\|x_t(0) - x_t^e\|$ . The proof relies on the expressions of the steady state  $x_t^e$  and the initialized state  $x_t(0)$  of a canonical-form system.

**Lemma 5** (The steady state and the initialized state of canonical-form systems). *Consider a canonical-form system:  $x_{t+1} = Ax_t + Bu_t$ .*

(a) *Any steady state  $(x, u)$  is in the form of*

$$\begin{aligned} x &= (\underbrace{z^1, \dots, z^1}_{p_1}, \underbrace{z^2, \dots, z^2}_{p_2}, \dots, \underbrace{z^m, \dots, z^m}_{p_m})^\top \\ u &= (z^1, \dots, z^m)^\top - A(\mathcal{I}, :)x \end{aligned}$$

for some  $z^1, \dots, z^m \in \mathbb{R}$ . Let  $z = (z^1, \dots, z^m)^\top$ . For the optimal steady state with respect to cost  $f_t + g_t$ , we denote the corresponding  $z$  as  $z_t^e$ , and the optimal steady state can be represented as  $x_t^e = (z_t^{e,1}, \dots, z_t^{e,1}, z_t^{e,2}, \dots, z_t^{e,2}, \dots, z_t^{e,m}, \dots, z_t^{e,m})^\top$  and  $u_t^e = z_t^e - A(\mathcal{I}, :)x_t^e$  for  $0 \leq t \leq N-1$ .

(b) By FOSS initialization,  $z_{t+1}(0) = z_t^e$ , and  $x_t(0)$ ,  $u_t(0)$  satisfy

$$x_t(0) = (\underbrace{z_{t-p_1}^{e,1}, \dots, z_{t-1}^{e,1}}_{p_1}, \underbrace{z_{t-p_2}^{e,2}, \dots, z_{t-1}^{e,2}}_{p_2}, \dots, \underbrace{z_{t-p_m}^{e,m}, \dots, z_{t-1}^{e,m}}_{p_m}), \quad 0 \leq t \leq N$$

$$u_t(0) = z_t^e - A(\mathcal{I}, :)x_t(0) \quad 0 \leq t \leq N-1$$

where  $z_t^e = 0$  for  $t \leq -1$ .

*Proof.* (a) This is by the definition of the canonical form and the definition of the steady state.

(b) By the initialization,  $z_t(0) = x_{t-1}^{e,\mathcal{I}} = z_{t-1}^e$ . By the relation between  $z_t(0)$  and  $x_t(0)$ ,  $u_t(0)$ , we have  $x_t^{\mathcal{I}}(0) = z_t(0) = z_{t-1}^e$ , and  $x_{t-1}^{\mathcal{I}}(0) = z_{t-1}(0) = z_{t-2}^e$ , so on and so forth. This proves the structure of  $x_t(0)$ . The structure of  $u_t(0)$  is because  $u_t(0) = z_{t+1}(0) - A(\mathcal{I}, :)x_t(0) = z_t^e - A(\mathcal{I}, :)x_t(0)$

□

By Lemma 5, we can bound  $\|x_t(0) - x_t^e\|$  for  $0 \leq t \leq N-1$  by

$$\begin{aligned} \|x_t(0) - x_t^e\| &\leq \sqrt{\|z_{t-1}^e - z_t^e\|^2 + \dots + \|z_{t-p}^e - z_t^e\|^2} \\ &\leq \sqrt{\|x_{t-1}^e - x_t^e\|^2 + \dots + \|x_{t-p}^e - x_t^e\|^2} \\ &\leq \|x_{t-1}^e - x_t^e\| + \dots + \|x_{t-p}^e - x_t^e\| \\ &\leq p(\|x_{t-1}^e - x_t^e\| + \dots + \|x_{t-p}^e - x_{t-p+1}^e\|) \end{aligned} \quad (14)$$

Combining (12) (13) and (14) yields

$$\begin{aligned} \sum_{t=0}^{N-1} f_t(x_t(0)) - f_t(x_t^e) &\leq \sum_{t=0}^{N-1} \|\nabla f_t(x_t(0))\| \|x_t(0) - x_t^e\| \\ &\leq \sum_{t=0}^{N-1} l_f(\sqrt{n}\bar{x}^e + \bar{\theta}) p(\|x_{t-1}^e - x_t^e\| + \dots + \|x_{t-p}^e - x_{t-p+1}^e\|) \\ &\leq p^2 l_f(\sqrt{n}\bar{x}^e + \bar{\theta}) \sum_{t=0}^{N-1} \|x_{t-1}^e - x_t^e\| \end{aligned} \quad (15)$$

Notice that the constant term  $p^2 l_f(\sqrt{n}\bar{x}^e + \bar{\theta})$  does not depend on  $N, W$ .

Similarly, we can provide a bound on  $g_t(u_t(0)) - g_t(u_t^e)$ .

$$\begin{aligned} \sum_{t=0}^{N-1} g_t(u_t(0)) - g_t(u_t^e) &\leq \sum_{t=0}^{N-1} \|\nabla g_t(u_t(0))\| \|u_t(0) - u_t^e\| \\ &\leq \sum_{t=0}^{N-1} l_g \|u_t(0) - \xi_t\| \|u_t(0) - u_t^e\| \\ &\leq \sum_{t=0}^{N-1} l_g(\sqrt{n}\bar{u}^e + \bar{\xi}) \|A(\mathcal{I}, :)x_t(0) - A(\mathcal{I}, :)x_t^e\| \\ &\leq \sum_{t=0}^{N-1} l_g(\sqrt{n}\bar{u}^e + \bar{\xi}) \|A(\mathcal{I}, :)\| \|x_t(0) - x_t^e\| \\ &\leq p^2 l_g(\sqrt{n}\bar{u}^e + \bar{\xi}) \|A(\mathcal{I}, :)\| \sum_{t=0}^{N-1} \|x_{t-1}^e - x_t^e\| \end{aligned} \quad (16)$$

where the first inequality is by the convexity, the second inequality is because  $\xi_t$  is the global minimizer of  $g_t$  and  $g_t$  is  $l_g$ -smooth, the third inequality is by Assumption 3, Lemma 4 and Lemma

5, the fifth inequality is by (14). Notice that the constant term  $p^2 l_g(\sqrt{n}\bar{u}^e + \bar{\xi})\|A(\mathcal{I}, :)\|$  does not depend on  $N, W$ .

By (15) and (16), we complete the proof of the first inequality in the statement of Lemma 2:

$$J(FOSS) - \sum_{t=0}^{N-1} \lambda_t^e \leq c_1 \sum_{t=0}^{N-1} \|x_{t-1}^e - x_t^e\| + f_N(x_N(0))$$

where  $c_1$  does not depend on  $N, W$ .

By defining  $x_N^e = \theta_N$ , we can bound  $f_N(x_N(0))$  by  $\|x_N(0) - x_N^e\|$  up to some constants because  $f_N(x_N(0)) = f_N(x_N(0)) - f_N(\theta_N) \leq \frac{l_f}{2}(\sqrt{n}\bar{x}^e + \bar{\theta})\|x_N(0) - x_N^e\|$ . By the same argument as in (14), we have  $\|x_N(0) - x_N^e\| = O(\sum_{t=0}^N \|x_{t-1}^e - x_t^e\|)$ , where the big  $O$  hides some constant that does not depend on  $N, W$ . Consequently,

$$J(FOSS) - \sum_{t=0}^{N-1} \lambda_t^e = O\left(\sum_{t=0}^N \|x_{t-1}^e - x_t^e\|\right)$$

□

## D.2 Proof of Lemma 3.

The proof heavily relies on dynamic programming and the Bellman equations. For simplicity, we introduce a Bellman operator  $\mathcal{B}(f + g, h)$  defined by  $\mathcal{B}(f + g, h)(x) = \min_u(f(x) + g(u) + h(Ax + Bu))$ . Now the Bellman equations can be written as  $\mathcal{B}(f + g, h^e)(x) = h^e(x) + \lambda^e$  for any  $x$ .

We define a sequence of auxiliary functions  $S_k$ :  $S_k(x) = h_k^e(x) + \sum_{t=k}^{N-1} \lambda_t^e$  for  $k = 0, \dots, N$ , where  $h_N^e(x) = f_N(x)$ .

We first provide a recursive equation for  $S_k$ . By Bellman equations, we have  $h_k^e(x) + \lambda_k^e = \mathcal{B}(f_k + g_k, h_k^e)(x)$  for  $0 \leq k \leq N-1$ . Let  $\pi_k^e$  be the corresponding optimal control policy that solves the Bellman equations. We have the following recursive relation for  $S_k$  when  $0 \leq k \leq N-1$ :

$$S_k(x) = \mathcal{B}(f_k + g_k, S_{k+1} - h_{k+1}^e + h_k^e)(x)$$

where  $S_N(x) = f_N(x)$ .

Further, let  $V_k(x)$  denote the optimal cost-to-go function from  $k$  to  $N$ , then we obtain a recursive equation for  $V_k$  by dynamic programming:

$$V_k(x) = \mathcal{B}(f_k + g_k, V_{k+1})(x) = f_k(x) + g_k(\pi_k^*(x)) + V_{k+1}(Ax + B\pi_k^*(x))$$

where  $0 \leq k \leq N-1$ , and  $\pi_k^*$  denotes the optimal control policy and  $V_N(x) = f_N(x)$ .

Now, we are ready for a recursive inequality for  $S_k(x_k^*) - V_k(x_k^*)$ . Let  $\{x_k^*\}$  denote the optimal trajectory, then  $x_{k+1}^* = Ax_k^* + B\pi_k^*(x_k^*)$ . For any  $k = 0, \dots, N-1$ ,

$$\begin{aligned} S_k(x_k^*) - V_k(x_k^*) &= \mathcal{B}(f_k + g_k, S_{k+1} - h_{k+1}^e + h_k^e)(x_k^*) - \mathcal{B}(f_k + g_k, V_{k+1})(x_k^*) \\ &\leq f_k(x_k^*) + g_k(\pi_k^*(x_k^*)) + S_{k+1}(x_{k+1}^*) - h_{k+1}^e(x_{k+1}^*) + h_k^e(x_{k+1}^*) \\ &\quad - (f_k(x_k^*) + g_k(\pi_k^*(x_k^*)) + V_{k+1}(x_{k+1}^*)) \\ &= S_{k+1}(x_{k+1}^*) - h_{k+1}^e(x_{k+1}^*) + h_k^e(x_{k+1}^*) - V_{k+1}(x_{k+1}^*) \end{aligned}$$

where the first inequality is because  $\pi_k^*$  is not optimal for the Bellman operator  $\mathcal{B}(f_k + g_k, S_{k+1} - h_{k+1}^e + h_k^e)(x_k^*)$ .

Summing over  $k = 0, \dots, N-1$  the recursive inequality for  $S_k(x_k^*) - V_k(x_k^*)$  yields

$$S_0(x_0) - V_0(x_0) \leq \sum_{k=0}^{N-1} (h_k^e(x_{k+1}^*) - h_{k+1}^e(x_{k+1}^*))$$

By subtracting  $h_0^e(x_0)$  on both sides,

$$\sum_{t=0}^{N-1} \lambda_t^e - J^* \leq \sum_{k=0}^{N-1} (h_k^e(x_{k+1}^*) - h_{k+1}^e(x_{k+1}^*)) - h_0^e(x_0)$$

For the simplicity of notation, we define  $h_{-1}^e(x_0) = 0$  and  $x_0^* = x_0$ , then the bound can be written as

$$\sum_{t=0}^{N-1} \lambda_t^e - J^* \leq \sum_{k=0}^N (h_{k-1}^e(x_k^*) - h_k^e(x_k^*))$$

□

### D.3 Proof of Lemma 4

The proof relies on the (strong) convexity and smoothness of the cost functions and the uniform upper bounds on  $\theta_t, \xi_t$ .

First of all, suppose there exists  $\bar{x}^e$  such that  $\|x_t^e\|_2 \leq \bar{x}^e$  for all  $0 \leq t \leq N-1$ . We will bound  $u_t^e, x_t(0), u_t(0)$  by using  $\bar{x}^e$ . Notice that the optimal steady state and the corresponding steady control satisfy:  $u_t^e = x_t^{e,\mathcal{I}} - A(\mathcal{I}, :)x_t^e$ . If we can bound  $x_t^e$  by  $\|x_t^e\| \leq \bar{x}^e$  for all  $t$ ,  $u_t^e$  can be bounded accordingly:

$$\|u_t^e\| \leq \|x_t^{e,\mathcal{I}}\| + \|A(\mathcal{I}, :)x_t^e\| \leq \|x_t^e\| + \|A(\mathcal{I}, :)\| \|x_t^e\| \leq (1 + \|A(\mathcal{I}, :)\|) \bar{x}^e =: \bar{u}^e$$

Moreover,  $x_t(0)$  can also be bounded by  $\bar{x}^e$  multiplied by some factors, because by Lemma 5,  $x_t(0)$ 's each entry is determined by some entry of  $x_s^e$  for  $s < t$ . As a result, for  $0 \leq t \leq N$

$$\|x_t(0)\|_2 \leq \sqrt{n} \|x_t(0)\|_\infty \leq \sqrt{n} \max_{s < t} \|x_s^e\|_\infty \leq \sqrt{n} \max_{s < t} \|x_s^e\|_2 \leq \sqrt{n} \bar{x}^e$$

We can bound  $u_t(0)$  by noticing that  $u_t(0) = x_{t+1}^{\mathcal{I}}(0) - A(\mathcal{I}, :)x_t(0)$  and

$$\begin{aligned} \|u_t(0)\| &\leq \|x_{t+1}^{\mathcal{I}}(0)\| + \|A(\mathcal{I}, :)x_t(0)\| \leq \|x_{t+1}(0)\| + \|A(\mathcal{I}, :)\| \|x_t(0)\| \\ &\leq (1 + \|A(\mathcal{I}, :)\|) \sqrt{n} \bar{x}^e = \sqrt{n} \bar{u}^e \end{aligned}$$

Next, it suffices to prove  $\|x_t^e\| \leq \bar{x}^e$  for all  $t$  for some  $\bar{x}^e$ . To prove this bound, we construct another (suboptimal) steady state:  $\hat{x}_t = (\theta_t^1, \dots, \theta_t^1)$ . Let  $\hat{u}_t = \hat{x}_t^{\mathcal{I}} - A(\mathcal{I}, :)\hat{x}_t$ . It can be easily verified that  $(\hat{x}_t, \hat{u}_t)$  is indeed a steady state of the canonical-form system. Moreover,  $\hat{x}_t$  and  $\hat{u}_t$  can be bounded similarly as follows.

$$\begin{aligned} \|\hat{x}_t\| &\leq \sqrt{n} |\theta_t^1| \leq \sqrt{n} \|\theta_t\|_\infty \leq \sqrt{n} \|\theta_t\| \leq \sqrt{n} \bar{\theta} \\ \|\hat{u}_t\|_2 &\leq (1 + \|A(\mathcal{I}, :)\|) \|\hat{x}_t\| \leq (1 + \|A(\mathcal{I}, :)\|) \sqrt{n} \bar{\theta} \end{aligned}$$

Now, we can bound  $\|x_t^e - \theta_t\|$ .

$$\begin{aligned} \frac{\mu}{2} \|x_t^e - \theta_t\|^2 &\leq f_t(x_t^e) - f_t(\theta_t) + g_t(u_t^e) - g_t(\xi_t) \\ &\leq f_t(\hat{x}_t) - f_t(\theta_t) + g_t(\hat{u}_t) - g_t(\xi_t) \\ &\leq \frac{l_f}{2} \|\hat{x}_t - \theta_t\|^2 + \frac{l_g}{2} \|\hat{u}_t - \xi_t\|^2 \\ &\leq l_f (\|\hat{x}_t\|^2 + \|\theta_t\|^2) + l_g (\|\hat{u}_t\|^2 + \|\xi_t\|^2) \\ &\leq l_f (n\bar{\theta}^2 + \bar{\theta}^2) + l_g ((1 + \|A(\mathcal{I}, :)\|) \sqrt{n} \bar{\theta})^2 + \bar{\xi} =: c_5 \end{aligned}$$

where the first inequality is by  $f_t$ 's strong convexity and  $g_t$ 's convexity, the second inequality is because  $(x_t^e, u_t^e)$  is an optimal steady state, the third inequality is by the smoothness and  $\nabla f_t(\theta_t) = \nabla g_t(\xi_t) = 0$ , the last inequality is by the bounds of  $\|\hat{x}_t\|$ ,  $\|\hat{u}_t\|$ ,  $\theta_t$ , and  $\xi_t$ .

As a result, we have  $\|x_t^e - \theta_t\| \leq \sqrt{2c_5/\mu}$ . Then, we can bound  $x_t^e$  by  $\|x_t^e\| \leq \|\theta_t\| + \sqrt{2c_5/\mu} \leq \bar{\theta} + \sqrt{2c_5/\mu} =: \bar{x}^e$  for all  $t$ . It can be verified that  $\bar{x}^e$  does not depend on  $N, W$ .

□

## E Linear quadratic tracking

In this section, we will provide a regret bound in Corollary 2 for the general LQT defined in Example 1. Based on this, we prove Corollary 1, which is a special case when  $Q_t, R_t$  are not changing.

### E.1 Regret bound on the general online LQT problems

Before the regret bound, we provide an important lemma to characterize the solution to the Bellman equations of the LQT problem.

**Lemma 6.** *One solution to the Bellman equations with stage cost  $\frac{1}{2}(x - \theta)^\top Q(x - \theta) + \frac{1}{2}u^\top Ru$  can be represented by*

$$h^e(x) = \frac{1}{2}(x - \beta^e)^\top P^e(x - \beta^e) \quad (17)$$

where  $P^e$  denotes the solution to the discrete-time algebraic Riccati equation (DARE) with respect to  $Q, R, A, B$

$$P^e = Q + A^\top (P^e - P^e B (B^\top P^e B + R)^{-1} B^\top P^e) A \quad (18)$$

and  $\beta^e = F\theta$  where  $F$  is a matrix determined by  $A, B, Q, R$ .

The proof is in Appendix G.

For simplicity of notation, let  $P^e(Q, R)$  denote the solution to the DARE under the parameters  $Q, R, A, B$  and  $F(Q, R)$  denote the matrix in  $\beta^e = F\theta$  given parameters  $Q, R, A, B$ . Here we omit  $A, B$  in the arguments of the functions because they will not change in this paper.

In addition, we introduce the following useful notations:  $\underline{Q} = \mu_f I_n, \bar{Q} = l_f I_n, \underline{R} = \mu_g I_m, \bar{R} = l_g I_m$  for  $\mu_f, \mu_g > 0, 0 < l_f, l_g < +\infty$ ; and  $\bar{P} = P^e(\bar{Q}, \bar{R})$  and  $\underline{P} = P^e(\underline{Q}, \underline{R})$ . Based on the notations above, we define some sets of matrices to be used later:

$$\begin{aligned} \mathcal{Q} &= \{Q \mid \underline{Q} \leq Q \leq \bar{Q}\}, \\ \mathcal{R} &= \{R \mid \underline{R} \leq R \leq \bar{R}\}, \\ \mathcal{P} &= \{P \mid \underline{P} \leq P \leq \bar{P}\}. \end{aligned}$$

Now, we are ready for the regret bound for the general LQT problem.

**Corollary 2** (Bound on general LQT). *Consider the LQT problem in Example 1. Suppose for  $t = 0, 1, \dots, N-1$ , the cost matrices satisfy  $Q_t \in \mathcal{Q}, R_t \in \mathcal{R}$ . Suppose the terminal cost function satisfies  $Q_N \in \mathcal{P}$ .<sup>5</sup> Then, the regret of RHTM with initialization FOSS can be bounded by*

$$\text{Regret}(RHTM) = O\left(\zeta^2 \left(\frac{\sqrt{\zeta}-1}{\sqrt{\zeta}}\right)^{2K} \left(\sum_{t=1}^N (\|P_t^e - P_{t-1}^e\| + \|\beta_t^e - \beta_{t-1}^e\|) + \sum_{t=0}^N \|x_{t-1}^e - x_t^e\|\right)\right)$$

where  $K = \lfloor (W-1)/p \rfloor$ ,  $x_{-1}^e = x_0$ ,  $x_N^e = \theta_N$ ,  $\zeta$  is the condition number of the corresponding  $C(\mathbf{z})$ ,  $(x_t^e, u_t^e)$  is the optimal steady state under cost  $Q_t, R_t, \theta_t$ ,  $P_t^e = P^e(Q_t, R_t)$  and  $\beta_t^e = F(Q_t, R_t)\theta_t$  for  $t = 0, \dots, N-1$  and  $\beta_N^e = \theta_N$ ,  $P_N^e = Q_N$ .

*Proof.* Before the proof, we introduce some supportive lemmas on the uniform bounds of  $P_t^e, \beta_t^e, x_t^*$  respectively. The intuition behind these uniform bounds is that the cost function coefficients  $Q_t, R_t, \theta_t$  are all uniformly bounded by Assumption 2 and 3. The proofs are technical and deferred to Appendix G.

**Lemma 7** (Upper bound on  $x_t^*$ ). *For any  $Q_t \in \mathcal{Q}, R_t \in \mathcal{R}, Q_N \in \mathcal{P}$ , there exists  $\bar{x}$  that does not depend on  $t, N, W$ , such that*

$$\|x_t^*\|_2 \leq \bar{x}, \quad \forall 0 \leq t \leq N.$$

**Lemma 8** (Upper bound on  $\beta^e$ ). *For any  $Q \in \mathcal{Q}, R \in \mathcal{R}$ , any  $\|\theta\| \leq \bar{\theta}$ , there exists  $\bar{\beta} \geq 0$  that does not depend on  $N$  and only depends on  $A, B, l_f, \mu_f, l_g, \mu_g, \bar{\theta}$ , such that  $\max(\bar{\theta}, \|\beta^e\|) \leq \bar{\beta}$ , where  $\beta^e$  is defined in Lemma 6.*

**Lemma 9** (Upper bound on  $P^e$ ). *For any  $Q \in \mathcal{Q}, R \in \mathcal{R}$ , we have  $P^e = P^e(Q, R) \in \mathcal{P}$ . Consequently,  $\|P^e\| \leq v_{\max}(\bar{P})$ , where  $v_{\max}(\bar{P})$  denotes the largest eigenvalue of  $\bar{P}$ .*

<sup>5</sup>This additional condition is for technical simplicity and can be removed.

Now, we are ready for the proof of Corollary 2.

By Theorem 2, we only need to bound  $\sum_{t=0}^N (h_{t-1}^e(x_t^*) - h_t^e(x_t^*))$ . By definition,  $P_N^e = Q_N$ ,  $\beta_N^e = \theta_N$ ,  $h_N^e(x) = f_N(x)$ , so we can write  $h_t^e(x) = \frac{1}{2}(x - \beta_t^e)^\top P_t^e(x - \beta_t^e)$  for  $0 \leq t \leq N$ .

For  $0 \leq t \leq N - 1$ , we split  $h_t^e(x_{t+1}^*) - h_{t+1}^e(x_{t+1}^*)$  into two parts.

$$\begin{aligned} h_t^e(x_{t+1}^*) - h_{t+1}^e(x_{t+1}^*) &= \frac{1}{2}(x_{t+1}^* - \beta_t^e)^\top P_t^e(x_{t+1}^* - \beta_t^e) - \frac{1}{2}(x_{t+1}^* - \beta_{t+1}^e)^\top P_{t+1}^e(x_{t+1}^* - \beta_{t+1}^e) \\ &= \underbrace{\frac{1}{2}(x_{t+1}^* - \beta_t^e)^\top P_t^e(x_{t+1}^* - \beta_t^e) - \frac{1}{2}(x_{t+1}^* - \beta_{t+1}^e)^\top P_t^e(x_{t+1}^* - \beta_{t+1}^e)}_{\text{Part 1}} \\ &\quad + \underbrace{\frac{1}{2}(x_{t+1}^* - \beta_{t+1}^e)^\top P_t^e(x_{t+1}^* - \beta_{t+1}^e) - \frac{1}{2}(x_{t+1}^* - \beta_{t+1}^e)^\top P_{t+1}^e(x_{t+1}^* - \beta_{t+1}^e)}_{\text{Part 2}} \end{aligned}$$

Part 1 can be bounded by the following

$$\begin{aligned} \text{Part 1} &= \frac{1}{2}(x_{t+1}^* - \beta_t^e + x_{t+1}^* - \beta_{t+1}^e)^\top P_t^e(x_{t+1}^* - \beta_t^e - (x_{t+1}^* - \beta_{t+1}^e)) \\ &\leq \frac{1}{2}\|x_{t+1}^* - \beta_t^e + x_{t+1}^* - \beta_{t+1}^e\|_2 \|P_t^e\|_2 \|\beta_{t+1}^e - \beta_t^e\|_2 \\ &\leq (\bar{x} + \bar{\beta}) v_{\max}(\bar{P}) \|\beta_{t+1}^e - \beta_t^e\|_2 \end{aligned}$$

where the last inequality is by Lemma 7, 8 9.

Part 2 can be bounded by the following when  $0 \leq t \leq N - 1$ ,

$$\begin{aligned} \text{Part 2} &= \frac{1}{2}(x_{t+1}^* - \beta_{t+1}^e)^\top (P_t^e - P_{t+1}^e)(x_{t+1}^* - \beta_{t+1}^e) \\ &\leq \frac{1}{2}\|x_{t+1}^* - \beta_{t+1}^e\|_2^2 \|P_t^e - P_{t+1}^e\|_2 \leq \frac{1}{2}(\bar{x} + \bar{\beta})^2 \|P_t^e - P_{t+1}^e\|_2 \end{aligned}$$

Therefore, we have

$$\begin{aligned} \sum_{t=0}^N (h_{t-1}^e(x_t^*) - h_t^e(x_t^*)) &\leq \sum_{t=0}^{N-1} (h_t^e(x_{t+1}^*) - h_{t+1}^e(x_{t+1}^*)) \\ &= O\left(\sum_{t=0}^{N-1} (\|\beta_{t+1}^e - \beta_t^e\|_2 + \|P_t^e - P_{t+1}^e\|_2)\right) \end{aligned} \quad (19)$$

where the first inequality is by  $h_0^e(x) \geq 0$  and  $h_{-1}^e(x) = 0$ . Thus, by Theorem 2, we have

$$\text{Regret}(RHTM) = O\left(\zeta^2 \left(\frac{\sqrt{\zeta} - 1}{\sqrt{\zeta}}\right)^{2K} \left(\sum_{t=1}^N (\|P_t^e - P_{t-1}^e\| + \|\beta_t^e - \beta_{t-1}^e\|) + \sum_{t=0}^N \|x_{t-1}^e - x_t^e\|\right)\right)$$

□

## E.2 Proof of Corollary 1

Roughly speaking, the proof is mostly by applying Corollary 2 and by showing  $\|\beta_t^e - \beta_{t-1}^e\|$  and  $\|x_t^e - x_{t-1}^e\|$  can be bounded by  $\|\theta_t - \theta_{t-1}\|$  up to some constants and  $\|P_t^e - P_{t-1}^e\| = 0$  in the LQT problem (9) where  $Q$  and  $R$  are not changing. However, directly applying the results in Theorem 2 and Corollary 2 will result in some extra constant terms because some inequalities used to derive the bounds in Theorem 2 and Corollary 2 are not necessary when  $Q, R$  are not changing. Therefore, we will need some intermediate results in the proofs of Theorem 2 and Corollary 2 to prove Corollary 1.

Firstly, by Lemma 2 and Lemma 3, we have

$$J(FOSS) - J^* = J(FOSS) - \sum_{t=0}^{N-1} \lambda_t^e + \sum_{t=0}^{N-1} \lambda_t^e - J^*$$

$$\leq c_1 \underbrace{\sum_{t=0}^{N-1} \|x_{t-1}^e - x_t^e\|}_{\text{Part I}} + \underbrace{\sum_{t=0}^{N-1} (h_t^e(x_{t+1}^*) - h_{t+1}^e(x_{t+1}^*))}_{\text{Part II}} + \underbrace{f_N(x_N(0)) - h_0^e(x_0)}_{\text{Part III}}$$

We are going to bound each part by  $\sum_t \|\theta_t - \theta_{t-1}\|$  in the following.

**Part I:** We will bound Part I by  $\sum_t \|\theta_t - \theta_{t-1}\|$  through showing that  $x_t^e = F_1 F_2 \theta_t$  for some matrices  $F_1, F_2$ . The representation of  $x_t^e$  relies on Lemma 5.

By Lemma 5, any steady state  $(x, u)$  can be represented as a matrix multiplied by  $z$ :

$$x = (\underbrace{z^1, \dots, z^1}_{p_1}, \underbrace{z^2, \dots, z^2}_{p_2}, \dots, \underbrace{z^m, \dots, z^m}_{p_m})^\top =: F_1 z$$

$$u = (z^1, \dots, z^m)^\top - A(\mathcal{I}, :)x = (I_m - A(\mathcal{I}, :)F_1)z$$

where  $F_1 \in \mathbb{R}^{n,m}$  is a binary matrix with full column rank.

Consider cost function  $\frac{1}{2}(x - \theta)^\top Q(x - \theta) + \frac{1}{2}u^\top R u$ . By the steady-state representation above, the optimal steady state can be solved by the following unconstrained optimization:

$$\min_z (F_1 z - \theta)^\top Q(F_1 z - \theta) + z^\top (I - A(\mathcal{I}, :)F_1)^\top R(I - A(\mathcal{I}, :)F_1)z$$

Since  $F_1$  is full column rank, the function is strongly convex and has the unique solution

$$z^e = F_2 \theta \quad (20)$$

where  $F_2 = (F_1^\top Q F_1 + (I - A(\mathcal{I}, :)F_1)^\top R(I - A(\mathcal{I}, :)F_1))^{-1} F_1^\top Q$ . Accordingly, the optimal steady state can be represented as

$$x^e = F_1 F_2 \theta, \quad u^e = (I_m - A(\mathcal{I}, :)F_1)F_2 \theta. \quad (21)$$

Consequently, when  $1 \leq t \leq N-1$ ,  $\|x_t^e - x_{t-1}^e\| \leq \|F_1 F_2\| \|\theta_t - \theta_{t-1}\|$ . When  $t = 0$ ,  $\|x_0^e - x_{-1}^e\| \leq \|F_1 F_2\| \|\theta_0 - \theta_{-1}\|$  holds since  $x_{-1}^e = x_0 = \theta_{-1} = 0$ . Combining the upper bounds above, we have

$$\text{Part I} = O\left(\sum_{t=0}^{N-1} \|\theta_t - \theta_{t-1}\|\right)$$

**Part II:** By (19) in the proof of Corollary 2, and by noticing that  $P_t^e = P^e(Q, R)$  does not change, we have

$$\sum_{t=0}^{N-1} (h_t^e(x_{t+1}^*) - h_{t+1}^e(x_{t+1}^*)) = O\left(\sum_{t=0}^{N-1} \|\beta_{t+1}^e - \beta_t^e\|\right)$$

By Lemma 6,  $\beta_t^e = F(Q, R)\theta_t$  for  $0 \leq t \leq N-1$ . In addition, since  $\beta_N^e = \theta_N = 0$  as defined in (9) and Corollary 2, we can also write  $\beta_N^e = F(Q, R)\theta_N$ . Thus,

$$\text{Part II} = O\left(\sum_{t=0}^{N-1} \|\beta_{t+1}^e - \beta_t^e\|\right) = O\left(\sum_{t=1}^N \|\theta_t - \theta_{t-1}\|\right)$$

**Part III:** By our condition for the terminal cost function, we have  $f_N(x_N(0)) = \frac{1}{2}(x_N(0) - \beta_N^e)^\top P^e(x_N(0) - \beta_N^e)$ . By Lemma 6, we have  $h_0^e(x_0) = \frac{1}{2}(x_0 - \beta_0^e)^\top P^e(x_0 - \beta_0^e)$ . So Part III can be bounded by

$$\begin{aligned} \text{Part III} &= \frac{1}{2}(x_N(0) - \beta_N^e)^\top P^e(x_N(0) - \beta_N^e) - \frac{1}{2}(x_0 - \beta_0^e)^\top P^e(x_0 - \beta_0^e) \\ &= \frac{1}{2}(x_N(0) - \beta_N^e + x_0 - \beta_0^e)^\top P^e(x_N(0) - \beta_N^e - (x_0 - \beta_0^e)) \\ &\leq \frac{1}{2}\|x_N(0) - \beta_N^e + x_0 - \beta_0^e\| \|P^e\| \|x_N(0) - \beta_N^e - (x_0 - \beta_0^e)\| \\ &\leq \frac{1}{2}(\sqrt{n}\bar{x}^e + \bar{\beta} + \bar{\beta}) \|P^e\| (\|x_N(0) - x_0\| + \|\beta_N^e - \beta_0^e\|) \end{aligned}$$

where the last inequality is by  $x_0 = 0$ , Lemma 4, Lemma 8.

Next we will bound  $\|x_N(0) - x_0\|$  and  $\|\beta_N^e - \beta_0^e\|$  respectively. Firstly, by  $\beta_t^e = F(Q, R)\theta_t$  in Lemma 6, we have

$$\|\beta_N^e - \beta_0^e\| \leq \sum_{t=0}^{N-1} \|\beta_{t+1}^e - \beta_t^e\| \leq \|F(Q, R)\| \sum_{t=0}^{N-1} \|\theta_{t+1} - \theta_t\|$$

Secondly, we will bound  $\|x_N(0) - x_0\|$ .

$$\begin{aligned} \|x_N(0) - x_0\| &\leq \|x_N(0) - x_{N-1}^e\| + \|x_{N-1}^e - x_0\| \\ &\leq \|x_N(0) - x_{N-1}^e\| + \sum_{t=0}^{N-1} \|x_t^e - x_{t-1}^e\| \\ &\leq \|x_N(0) - x_{N-1}^e\| + \|F_1 F_2\| \sum_{t=0}^{N-1} \|\theta_t - \theta_{t-1}\| \end{aligned}$$

where the second inequality is by  $x_0^e = x_0$ , the third inequality is by (21).

Next, we will focus on  $\|x_N(0) - x_{N-1}^e\|$ . By Lemma 5,

$$\begin{aligned} x_N(0) &= (z_{N-p_1}^{e,1}, \dots, z_{N-1}^{e,1}, z_{N-p_2}^{e,2}, \dots, z_{N-1}^{e,2}, \dots, z_{N-p_m}^{e,m}, \dots, z_{N-1}^{e,m})^\top \\ x_{N-1}^e &= (z_{N-1}^{e,1}, \dots, z_{N-1}^{e,1}, z_{N-1}^{e,2}, \dots, z_{N-1}^{e,2}, \dots, z_{N-1}^{e,m}, \dots, z_{N-1}^{e,m})^\top \end{aligned}$$

As a result,

$$\begin{aligned} \|x_N(0) - x_{N-1}^e\|^2 &\leq \|z_{N-2}^e - z_{N-1}^e\|^2 + \dots + \|z_{N-p}^e - z_{N-1}^e\|^2 \\ &= \|F_2\|^2 (\|\theta_{N-2} - \theta_{N-1}\|^2 + \dots + \|\theta_{N-p} - \theta_{N-1}\|^2) \end{aligned}$$

where the equality is by (20). Taking square root on both sides yields

$$\begin{aligned} \|x_N(0) - x_{N-1}^e\| &\leq \|F_1\| \sqrt{\|\theta_{N-2} - \theta_{N-1}\|^2 + \dots + \|\theta_{N-p} - \theta_{N-1}\|^2} \\ &\leq \|F_2\| (\|\theta_{N-2} - \theta_{N-1}\| + \dots + \|\theta_{N-p} - \theta_{N-1}\|) \\ &\leq \|F_2\| (p-1) \sum_{t=N-p}^{N-2} \|\theta_{t+1} - \theta_t\| \end{aligned}$$

Combining the bounds above leads to

$$\text{Part III} = O\left(\sum_{t=0}^{N-1} \|\theta_{t+1} - \theta_t\|\right)$$

The proof is completed by summing up the bounds for Part I, II, III.

## F Proof of Theorem 3

*Proof intuition:* By the problem transformation in Section 3.1, the fundamental limit of the online control problem is equivalent to the fundamental limit of the online convex optimization problem with objective  $C(\mathbf{z})$ . Therefore, we will focus on  $C(\mathbf{z})$ . Since the lower bound is for the worst case scenario, we only need to construct some tracking trajectories  $\{\theta_t\}$  for Theorem 3 to hold. However, it is generally difficult to construct the tracking trajectories, so we consider randomly generated  $\theta_t$  and show that the regret in expectation can be lower bounded. Then, there must exist some realization of the randomly generated  $\{\theta_t\}$  such that the regret lower bound holds.

*Formal proof:*

**Step 1: construct LQ tracking.** For simplicity, we construct a single-input system with  $n = p$  and  $A \in \mathbb{R}^{n,n}$  and  $B \in \mathbb{R}^{n \times 1}$  as follows:<sup>6</sup>

$$A = \begin{pmatrix} 0 & 1 & \dots & 0 \\ \vdots & \ddots & \ddots & \vdots \\ & & 0 & 1 \\ 1 & 0 & \dots & 0 \end{pmatrix}, \quad B = \begin{pmatrix} 0 \\ \vdots \\ 0 \\ 1 \end{pmatrix}$$

<sup>6</sup>It is easy to generalize the construction to multi-input case by constructing  $m$  decoupled subsystems.

$(A, B)$  is controllable because  $(B, AB, \dots, A^{p-1}B)$  is full rank.  $A$ 's controllability index is  $p = n$ . Next, we construct  $Q$  and  $R$ . For any  $\zeta > 1$  and  $p$ , define  $\delta = \frac{4}{(\zeta-1)p}$ . Let  $Q = \delta I_n$  and  $R = 1$  for  $0 \leq t \leq N-1$ . Let  $P^e = P^e(Q, R)$  be the solution to the DARE. The next lemma shows that  $P^e$  is a diagonal matrix and its diagonal entries can be characterized.

**Lemma 10** (Form of  $P^e$ ). *Let  $P^e$  denote the solution to the DARE determined by  $A, B, Q, R$  defined above. Then  $P^e$  satisfies the form*

$$P^e = \begin{pmatrix} q_1 & 0 & \cdots & 0 \\ 0 & q_2 & \cdots & 0 \\ & & \ddots & \\ 0 & & \cdots & q_n \end{pmatrix},$$

where  $q_i = q_1 + (i-1)\delta$  for  $1 \leq i \leq n$  and  $\delta < q_1 < \delta + 1$ .

*Proof of Lemma 10.* The DARE exists a unique positive definite solution [59]. Suppose the solution is diagonal and substitute it in the DARE as follows.

$$P^e = Q + A^\top (P^e - P^e B (B^\top P^e B + R)^{-1} B^\top P^e) A$$

$$\begin{pmatrix} q_1 & 0 & \cdots & 0 \\ 0 & q_2 & \cdots & 0 \\ & & \ddots & \\ 0 & & \cdots & q_n \end{pmatrix} = \begin{pmatrix} q_n/(1+q_n) + \delta & 0 & \cdots & 0 \\ 0 & q_1 + \delta & \cdots & 0 \\ & & \ddots & \\ 0 & & \cdots & q_{n-1} + \delta \end{pmatrix}$$

So we have  $q_i = q_{i-1} + \delta$  for  $1 \leq i \leq n-1$ , and  $q_n/(1+q_n) + \delta = q_1 = q_n - (n-1)\delta$ . Thus,  $q_n = \frac{n\delta + \sqrt{n^2\delta^2 + 4n\delta}}{2} > n\delta$ . It is straightforward that  $q_1 = q_n - (n-1)\delta > \delta > 0$ , and  $q_1 < \delta + 1$  by  $q_n/(1+q_n) < 1$ . So we have found the unique positive definite solution to the DARE.  $\square$

Next, we will construct  $\theta_t$ . Let  $\theta_0 = \theta_N = \beta_N^e = 0$  for simplicity. For  $\theta_t$  when  $1 \leq t \leq N-1$ , we divide the  $N-1$  stages into  $E$  epochs, each with length  $\Delta = \lceil \frac{N-1}{\lfloor \frac{L_N}{2\bar{\theta}} \rfloor} \rceil$ , possibly except the last epoch. This is possible because  $1 \leq \Delta \leq N-1$  by the conditions in Theorem 3. Thus,  $E = \lceil \frac{N-1}{\Delta} \rceil$ . Let  $\mathcal{J}$  be the first stage of the each epoch:  $\mathcal{J} = \{1, \Delta+1, \dots, (E-1)\Delta+1\}$ . Let  $\theta_t$  for  $t \in \mathcal{J}$  independently and identically follow the distribution below.

$$\Pr(\theta_t^i = a) = \begin{cases} 1/2 & \text{if } a = \sigma \\ 1/2 & \text{if } a = -\sigma \end{cases}, \quad \text{i.i.d. for all } i \in [n], t \in \mathcal{J},$$

where  $\sigma = \frac{\bar{\theta}}{\sqrt{n}}$ . It can be easily verified that  $\|\theta\| = \bar{\theta}$  for any realization of this distribution, so Assumption 3 is satisfied. Let the other  $\theta_t$  in each epoch be equal to the  $\theta$  at the start of their corresponding epochs, i.e.  $\theta_{k\Delta+1} = \theta_{k\Delta+2} = \dots = \theta_{(k+1)\Delta}$ , when  $k \leq E-1$ , and  $\theta_{k\Delta+1} = \dots = \theta_{N-1}$  when  $k = E$ . The following inequalities show that the constructed  $\{\theta_t\}$  satisfies the variation budget:

$$\begin{aligned} \sum_{t=0}^N \|\theta_t - \theta_{t-1}\| &= \|\theta_1 - \theta_0\| + \sum_{k=1}^{E-1} \|\theta_{k\Delta+1} - \theta_{k\Delta}\| + \|\theta_{N-1} - \theta_N\| \\ &\leq \bar{\theta} + 2(E-1)\bar{\theta} + \bar{\theta} = 2\bar{\theta}E \\ &\leq 2\bar{\theta} \lfloor \frac{L_N}{2\bar{\theta}} \rfloor \leq 2\bar{\theta} \frac{L_N}{2\bar{\theta}} = L_N \end{aligned}$$

where the first equality is by  $\theta_0 = \theta_{-1} = \theta_N = 0$ , the first inequality is by  $\|\theta_t\| = \bar{\theta}$  when  $1 \leq t \leq N-1$ , the second inequality is by  $\Delta = \lceil \frac{N-1}{\lfloor \frac{L_N}{2\bar{\theta}} \rfloor} \rceil \geq \frac{N-1}{\lfloor \frac{L_N}{2\bar{\theta}} \rfloor}$ , and thus  $\lfloor \frac{L_N}{2\bar{\theta}} \rfloor \geq \lceil \frac{N-1}{\Delta} \rceil = E$ .

The total cost of our constructed LQ tracking problem is

$$J(\mathbf{x}, \mathbf{u}) = \sum_{t=0}^{N-1} \left( \frac{\delta}{2} \|x_t - \theta_t\|^2 + \frac{1}{2} u_t^2 \right) + \frac{1}{2} x_N^\top P^e x_N$$

We will verify that  $C(\mathbf{z})$ 's condition number is  $\zeta$  in Step 2.

**Step 2: problem transformation and the optimal solution  $\mathbf{z}^*$ .** By the problem transformation in Section 3.1, we let  $z_t = x_t^n$ , and the equivalent cost function  $C(\mathbf{z})$  is given below.

$$C(\mathbf{z}) = \sum_{t=0}^{N-1} \left( \frac{\delta}{2} \sum_{i=1}^n (z_{t-n+i} - \theta_t^i)^2 + \frac{1}{2} (z_{t+1} - z_{t-n+1})^2 \right) + \frac{1}{2} \sum_{i=1}^n q_i z_{N-n+i}^2$$

and  $z_t = 0$  and  $\theta_t = 0$  for  $t \leq 0$ .

Since  $C(\mathbf{z})$  is strongly convex,  $\min C(\mathbf{z})$  admits a unique optimal solution, denoted as  $\mathbf{z}^*$ , which is determined by the first-order optimality condition:  $\nabla C(\mathbf{z}^*) = 0$ . In addition, our constructed  $C(\mathbf{z})$  is a quadratic function, so there exists a matrix  $H \in \mathbb{R}^{N \times N}$  and a vector  $\eta \in \mathbb{R}^N$  such that  $\nabla C(\mathbf{z}^*) = H\mathbf{z}^* - \eta = 0$ . By the partial gradients of  $C(\mathbf{z})$  below,

$$\begin{aligned} \frac{\partial C}{\partial z_t} &= \delta(z_t - \theta_t^n + z_t - \theta_{t+1}^{n-1} + \cdots + z_t - \theta_{t+n-1}^1) + z_t - z_{t+n} + z_t - z_{t-n}, \quad 1 \leq t \leq N-n \\ \frac{\partial C}{\partial z_t} &= \delta(z_t - \theta_t^n + \cdots + z_t - \theta_{N-1}^{n+t-N+1}) + q_{n+t-N} z_t + z_t - z_{t-n}, \quad N-n+1 \leq t \leq N \end{aligned}$$

For simplicity and without loss of generality, we assume that  $N/n$  is an integer. Then, by Lemma 10,  $H$  can be represented as the block matrix below

$$H = \begin{pmatrix} (\delta n + 2)I_n & -I_n & \cdots & & \\ & -I_n & (\delta n + 2)I_n & \ddots & \\ & & \ddots & \ddots & -I_n \\ & & & -I_n & (q_n + 1)I_n \end{pmatrix} \in \mathbb{R}^{N \times N}.$$

$\eta$  is a linear combination of  $\theta$ : for  $1 \leq t \leq N$ , we have  $\eta_t = \delta(\theta_t^n + \cdots + \theta_{t+n-1}^1) = \delta(e_n^\top \theta_t + \cdots + e_1^\top \theta_{t+n-1})$  where  $e_1, \dots, e_n \in \mathbb{R}^n$  are standard basis vectors and  $\theta_t = 0$  for  $t \geq N$ .

By Gergoskin's Disc Theorem and Lemma 10,  $H$ 's condition number is  $(\delta n + 4)/\delta n = \zeta$  by our choice of  $\delta$  in Step 1 and  $p = n$ . Thus we have shown that  $C(\mathbf{z})$ 's condition number is  $\zeta$ .

Since  $H$  is strictly diagonally dominant with positive diagonal entries and nonpositive off-diagonal entries,  $H$  is invertible and its inverse, denoted by  $Y$ , is nonnegative. Consequently, the optimal solution can be represented as  $\mathbf{z}^* = Y\eta$ . Since  $\eta$  is linear in  $\{\theta_t\}$ ,  $z_t^*$  is also linear in  $\{\theta_t\}$  and can be characterized by the following.

$$\begin{aligned} z_{t+1}^* &= \sum_{i=1}^N Y_{t+1,i} \eta_i = \delta \sum_{i=1}^N Y_{t+1,i} \sum_{j=0}^{n-1} e_{n-j}^\top \theta_{i+j} \\ &= \delta \sum_{k=1}^{N-1} \left( \sum_{i=1}^n Y_{t+1,i+k-n} e_i^\top \right) \theta_k \\ &=: \delta \sum_{k=1}^{N-1} v_{t+1,k} \theta_k \end{aligned} \tag{22}$$

where  $\theta_t = 0$  for  $t \geq N$ ,  $Y_{t+1,i} = 0$  for  $i \leq 0$ , and  $v_{t+1,k} := \sum_{i=1}^n Y_{t+1,i+k-n} e_i^\top$ .

In addition, we are able to show in the next lemma that  $Y$  has decaying row entries starting at the diagonal entries. The proof is technical and deferred to the Appendix F.1.

**Lemma 11.** *When  $N/n$  is an integer, the inverse of  $H$ , denoted by  $Y$ , can be represented as a block matrix*

$$Y = \begin{pmatrix} y_{1,1}I_n & y_{1,2}I_n & \cdots & y_{1,N/n}I_n \\ y_{2,1}I_n & y_{2,2}I_n & \cdots & y_{2,N/n}I_n \\ \vdots & \ddots & \ddots & \vdots \\ y_{N/n,1}I_n & y_{N/n,2}I_n & \cdots & y_{N/n,N/n}I_n \end{pmatrix}$$

where  $y_{t,t+\tau} \geq \frac{1-\rho}{\delta n+2} \rho^\tau > 0$  for  $\tau \geq 0$  and  $\rho = \frac{\sqrt{\zeta}-1}{\sqrt{\zeta}+1}$ .

**Step 3: characterize  $z_{t+1}(\mathcal{A}^z)$ .** For any online control algorithm  $\mathcal{A}$ , we can define an equivalent online algorithm for  $z$ , denoted as  $\mathcal{A}^z$ .  $\mathcal{A}^z$ , at each time  $t$ , outputs  $z_{t+1}(\mathcal{A}^z)$  based on the predictions and the history, i.e.,

$$z_{t+1}(\mathcal{A}^z) = \mathcal{A}^z(\{\theta_s\}_{s=0}^{t+W-1}), \quad t \geq 0$$

For simplicity, we consider online deterministic algorithm.<sup>7</sup> Notice that  $z_{t+1}$  is a random variable because  $\theta_1, \dots, \theta_{t+W-1}$  are random. Based on this observation and Lemma 11, we are able to provide a regret lower bound in Step 4.

**Step 4: prove the regret lower bound on  $\mathcal{A}$ .** Roughly speaking, the regret occurs when something unexpected happens beyond the prediction window, that is, at each  $t$ , the prediction window goes as far as  $t + W - 1$ , but if  $\theta_{t+W}$  changes from  $\theta_{t+W-1}$ , the online algorithm cannot prepare for it, resulting in poor control and positive regret. By our construction, when  $t + W \in \mathcal{J}$ ,  $\theta_{t+W}$  changes from  $\theta_{t+W-1}$ . To study such  $t$ , we define a set  $\mathcal{J}_1 = \{0 \leq t \leq N - W - 1 \mid t + W \in \mathcal{J}\}$ . It can be shown that the cardinality of  $\mathcal{J}_1$  can be lower bounded by  $L_N$  up to some constants:

$$|\mathcal{J}_1| \geq \frac{1}{18\theta} L_N \quad (23)$$

The proof of (23) is provided below.

$$\begin{aligned} |\mathcal{J}_1| &= |\{W \leq t \leq N - 1 \mid t \in \mathcal{J}\}| \\ &= |\mathcal{J}| - |\{1 \leq t \leq W - 1 \mid t \in \mathcal{J}\}| \\ &= \lceil \frac{N-1}{\Delta} \rceil - \lceil \frac{W-1}{\Delta} \rceil \\ &\geq \lfloor \frac{N-W}{\Delta} \rfloor \\ &\geq \frac{1}{2} \frac{N-W}{\Delta} \\ &\geq \frac{1}{2} \frac{N-W}{N-1 + \lfloor \frac{L_N}{2\theta} \rfloor} \lfloor \frac{L_N}{2\theta} \rfloor \\ &\geq \frac{1}{2} \frac{N - \frac{1}{3}N}{N-1 + N+1/2} \lfloor \frac{L_N}{2\theta} \rfloor \geq \frac{1}{6} \lfloor \frac{L_N}{2\theta} \rfloor \\ &\geq \frac{1}{6} \frac{2}{3} \frac{L_N}{2\theta} = \frac{1}{18} \frac{L_N}{\theta} \end{aligned}$$

where the first inequality is by the definition of the ceiling and floor operators, the second inequality is by  $\frac{N-W}{\Delta} \geq 1$  under the conditions on  $N, W, L_N$  in Theorem 3, the third inequality is by  $\Delta = \lceil \frac{N-1}{\lfloor \frac{L_N}{2\theta} \rfloor} \rceil \leq \frac{N-1}{\lfloor \frac{L_N}{2\theta} \rfloor} + 1$ , the fourth inequality is by  $L_N \leq (2N+1)\bar{\theta}$  in Theorem 3's statement, the last inequality is by  $L_N \geq 4\bar{\theta}$  in Theorem 3's statement.

Moreover, we can show in Lemma 12 that, for all  $t \in \mathcal{J}_1$ , the online decision  $z_{t+1}(\mathcal{A}^z)$  is different from the optimal solution  $z_{t+1}^*$  and the difference is lower bounded,

**Lemma 12.** For any online algorithm  $\mathcal{A}^z$ , when  $t \in \mathcal{J}_1$ ,

$$\mathbb{E} |z_{t+1}(\mathcal{A}^z) - z_{t+1}^*|^2 \geq c_{10} \sigma^2 \rho^{2K}$$

where  $c_{10}$  is a constant determined by  $A, B, n, Q, R$  constructed above and  $\rho = \frac{\sqrt{\zeta}-1}{\sqrt{\zeta}+1}$ .

The proof is provided in Appendix F.2.

The lower bound on the difference between the online decision and the optimal decision results in a lower bound on the regret. By the  $n\delta$ -strong convexity of  $C(\mathbf{z})$ ,

$$\begin{aligned} \mathbb{E}(C(\mathbf{z}(\mathcal{A}^z)) - C(\mathbf{z}^*)) &\geq \frac{\delta n}{2} \sum_{t \in \mathcal{J}_1} \mathbb{E} |z_{t+1}(\mathcal{A}^z) - z_{t+1}^*|^2 \\ &\geq |\mathcal{J}_1| c_{10} \sigma^2 \rho^{2K} \end{aligned}$$

<sup>7</sup>The proof can be easily generalized to random algorithms

$$\geq \frac{L_N}{18\theta} c_{10} \sigma^2 \rho^{2K} = \Omega(L_N \rho^{2K})$$

By the equivalence between  $\mathcal{A}$  and  $\mathcal{A}^z$ , we have  $\mathbb{E} J(\mathcal{A}) - \mathbb{E} J^* = \Omega(\rho^{2K} L_N)$ . By the property of expectation, there must exist some realization of the random  $\{\theta_t\}$  such that  $J(\mathcal{A}) - J^* = \Omega(\rho^{2K} L_N)$ , where  $\rho = \frac{\sqrt{\xi}-1}{\sqrt{\xi}+1}$ . This completes the proof.  $\square$

### F.1 Proof of Lemma 11

*Proof.* Since  $H$  is a block matrix

$$H = \begin{pmatrix} (\delta n + 2)I_n & -I_n & \cdots & \\ -I_n & (\delta n + 2)I_n & \ddots & \\ & \ddots & \ddots & -I_n \\ & & -I_n & (q_n + 1)I_n \end{pmatrix}$$

its inverse matrix  $Y$  can also be represented as a block matrix. Moreover, let

$$H_1 = \begin{pmatrix} \delta n + 2 & -1 & \cdots & 0 \\ -1 & \delta n + 2 & \ddots & 0 \\ \vdots & \ddots & \ddots & \vdots \\ 0 & \cdots & -1 & q_n + 1 \end{pmatrix}$$

and define  $\bar{Y} = (H_1)^{-1} = (y_{ij})_{i,j=1}^{N/n}$ . Then the inverse matrix  $Y$  can be represented as the block matrix:  $Y = (y_{ij} I_n)_{i,j=1}^{N/n}$ .

Now, it suffices to provide a lower bound on  $y_{ij}$ .

Since  $H_1$  is a symmetric positive definite tridiagonal matrix, by [63], the inverse has an explicit formula given by  $(H_1)_{ij}^{-1} = a_i b_j$  and

$$\begin{aligned} a_t &= \frac{\rho}{1 - \rho^2} \left( \frac{1}{\rho^t} - \rho^t \right) \\ b_t &= c_3 \frac{1}{\rho^{N-t}} + c_4 \rho^{N-t} \\ c_3 &= b_N \left( \frac{(q_n + 1)\rho - \rho^2}{1 - \rho^2} \right) \\ c_4 &= b_N \frac{1 - (q_n + 1)\rho}{1 - \rho^2} \\ b_N &= \frac{1}{-a_{N-1} + (q_n + 1)a_N} \end{aligned}$$

In the following, we will show  $y_{t,t+\tau} = a_t b_{t+\tau} \geq \frac{1-\rho}{\delta n+2} \rho^\tau$  when  $\tau \geq 0$ . Firstly, it is easy to verify that

$$\rho^t a_t = \frac{\rho}{1 - \rho^2} (1 - \rho^{2t}) \geq \rho$$

since  $t \geq 1$  and  $\rho < 1$ .

Secondly, we bound  $b_N$  in the following way:

$$\rho^{-N} b_N = \frac{1}{(q_n + 1)(1 - \rho^{2N}) - (\rho - \rho^{2N-1})} \frac{1 - \rho^2}{\rho} \geq \frac{1}{(\delta n + 2)} \frac{1 - \rho^2}{\rho}$$

because  $0 < (q_n + 1)(1 - \rho^{2N}) - (\rho - \rho^{2N-1}) \leq (\delta n + 2)$  by  $n\delta < q_n < n\delta + 1$  in Lemma 10.

Thirdly, we bound  $b_{t+\tau}$ . When  $1 - (q_n + 1)\rho \geq 0$

$$\rho^{N-t-\tau} b_{t+\tau} = b_N \left( \frac{(q_n + 1)\rho - \rho^2}{1 - \rho^2} \right) + b_N \frac{1 - (q_n + 1)\rho}{1 - \rho^2} \rho^{2(N-t-\tau)}$$

$$\begin{aligned}
&\geq b_N \left( \frac{(q_n + 1)\rho - \rho^2}{1 - \rho^2} \right) \\
&\geq b_N \left( \frac{(\delta n + 1)\rho - \rho^2}{1 - \rho^2} \right) \\
&= \frac{1 - \rho}{1 - \rho^2} b_N
\end{aligned}$$

where the first inequality is by  $1 - (q_n + 1)\rho \geq 0$ , the second inequality is by  $qn > n\delta$  in Lemma 10, and the last equality is by  $\rho^2 - (\delta n + 2)\rho + 1 = 0$ .

When  $1 - (q_n + 1)\rho < 0$

$$\begin{aligned}
\rho^{N-t-\tau} b_{t+\tau} &= b_N \left( \frac{(q_n + 1)\rho - \rho^2}{1 - \rho^2} \right) + b_N \frac{1 - (q_n + 1)\rho}{1 - \rho^2} \rho^{2(N-t-\tau)} \\
&\geq b_N \left( \frac{(q_n + 1)\rho - \rho^2}{1 - \rho^2} \right) + b_N \frac{1 - (q_n + 1)\rho}{1 - \rho^2} \\
&\geq b_N \geq \frac{1 - \rho}{1 - \rho^2} b_N
\end{aligned}$$

where the first inequality is by  $1 - (q_n + 1)\rho < 0, \rho \leq 1$ , the second inequality is by  $\rho^{2(N-t-\tau)} \leq 1$ . Thus, we obtained a lower bound for  $b_{t+\tau}$ .

Combining bounds of  $a_t, b_{t+\tau}, b_N$  together yields

$$y_{t,t+\tau} = a_t b_{t+\tau} \geq \rho b_N \frac{1 - \rho}{1 - \rho^2} \rho^{\tau-N} \geq \frac{1 - \rho}{(\delta n + 2)} \rho^\tau$$

□

## F2 Proof of Lemma 12

*Proof.* By our construction,  $\theta_t$  is random,  $z_{t+1}^A$  is also random and its randomness is provided by  $\theta_1, \dots, \theta_{t+W-1}$ , while  $z_{t+1}^*$  is determined by all  $\theta_t$ . When  $t \in \mathcal{J}_1$ ,

$$\begin{aligned}
\mathbb{E} |z_{t+1}^A - z_{t+1}^*|^2 &= \mathbb{E} |z_{t+1}^A - \delta \sum_{i=1}^{N-1} v_{t+1,i} \theta_i|^2 \\
&= \mathbb{E} |z_{t+1}^A - \delta \sum_{i=1}^{t+W-1} v_{t+1,i} \theta_i|^2 + \delta^2 \mathbb{E} \left| \sum_{i=t+W}^{N-1} v_{t+1,i} \theta_i \right|^2 \\
&\geq \delta^2 \mathbb{E} \left| \sum_{i=t+W}^{N-1} v_{t+1,i} \theta_i \right|^2,
\end{aligned}$$

where the first equality is by (22), the second equality is by  $\mathbb{E} \theta_\tau = 0$  for all  $\tau$ , and  $\theta_{t+W}, \dots, \theta_N$  are independent of  $\theta_1, \dots, \theta_{t+W-1}$  when  $t \in \mathcal{J}_1$ .

Further,

$$\begin{aligned}
\mathbb{E} \left| \sum_{i=t+W}^{N-1} v_{t+1,i} \theta_i \right|^2 &= \mathbb{E} \left| \sum_{i=t+W}^{t+W+\Delta-1} v_{t+1,i} \theta_{t+W} \right|^2 + \dots + \mathbb{E} \left| \sum_{i=(E-1)\Delta+1}^{N-1} v_{t+1,i} \theta_{(E-1)\Delta+1} \right|^2 \\
&= \left\| \sum_{i=t+W}^{t+W+\Delta-1} v_{t+1,i} \right\|^2 \sigma^2 + \dots + \left\| \sum_{i=(E-1)\Delta+1}^{N-1} v_{t+1,i} \right\|^2 \sigma^2 \\
&\geq \sigma^2 \sum_{i=t+W}^{N-1} \|v_{t+1,i}\|^2 \\
&= \sigma^2 \sum_{i=t+W}^{N-1} \left( \sum_{k=0}^{n-1} Y_{t+1,i-k}^2 \right) \geq \sigma^2 \sum_{i=t+1+W-n}^{N-1} Y_{t+1,i}^2
\end{aligned}$$

$$= \sigma^2 \sum_{i=t+1+W-n}^N Y_{t+1,i}^2$$

where the first equality is because the theta in one epoch are equal by our construction, the second equality is because  $\text{cov}(\theta_\tau) = \sigma^2 I_n$ , the first inequality is because the entries of  $v_{t+1,i}$  are nonnegative, the third equality is by the definition of  $v_{t+1,i}$  in (22), and the last equality is because when  $t \in \mathcal{J}_1$ ,  $Y_{t+1,N} = 0$ .

When  $1 \leq W \leq n$ ,  $\sum_{i=t+1+W-n}^N Y_{t+1,i}^2 \geq Y_{t+1,t+1}^2 = Y_{t+1,t+1+n\lfloor \frac{W-1}{n} \rfloor}^2$ . When  $W > n$ ,  $\sum_{i=t+1+W-n}^N Y_{t+1,i}^2 \geq Y_{t+1,t+1+n\lceil \frac{W-n}{n} \rceil}^2$ . Moreover, when  $W \geq 1$ ,  $\lceil \frac{W-n}{n} \rceil = \lfloor \frac{W-1}{n} \rfloor$ . In summary, for  $W \geq 1$ ,

$$\sum_{i=t+1+W-n}^N Y_{t+1,i}^2 \geq Y_{t+1,t+1+n\lfloor \frac{W-1}{n} \rfloor}^2 \geq \rho^{2K} \left( \frac{1-\rho}{\delta n + 2} \right)^2$$

where the last inequality is by Lemma 11. This completes the proof.  $\square$

## G Proofs of the LQT's properties used in Appendix E

In this section, we provide proofs for the properties of LQ tracking (LQT) used in Appendix E.

### G.1 Preliminaries: dynamic programming for finite-horizon LQT

In this section, we consider a discrete time LQ tracking problem with time-varying cost functions and time-invariant dynamical system:

$$\begin{aligned} \min_{x_t, u_t} \quad & \frac{1}{2} \sum_{t=0}^{N-1} [(x_t - \theta_t)^\top Q_t (x_t - \theta_t) + u_t^\top R_t u_t] + \frac{1}{2} (x_N - \theta_N)^\top Q_N (x_N - \theta_N) \\ \text{s.t.} \quad & x_{t+1} = Ax_t + Bu_t, \quad t = 0, \dots, N-1 \end{aligned}$$

where  $x_0 = 0$  for simplicity.

The problem can be solved by dynamic programming.

**Theorem 4** (Dynamic programming for the finite-horizon LQT). *Consider a finite-horizon time-varying LQ tracking problem. Let  $V_t(x_t)$  be the cost to go from  $k = t$  to  $k = N$ , then*

$$V_t(x_t) = \frac{1}{2} (x_t - \beta_t)^\top P_t (x_t - \beta_t) + \frac{1}{2} \sum_{k=t}^{N-1} (A\theta_k - \beta_{k+1})^\top H_k (A\theta_k - \beta_{k+1})$$

for  $t = 0, \dots, N$ . The parameters can be obtained by

$$\begin{aligned} P_t &= Q_t + A^\top M_t A, \quad t = 0, \dots, N-1, \quad P_N = Q_N \\ M_t &= P_{t+1} - P_{t+1} B (R_t + B^\top P_{t+1} B)^{-1} B^\top P_{t+1}, \quad t = 0, \dots, N-1 \\ \beta_t &= (Q_t + A^\top M_t A)^{-1} (Q_t \theta_t + A^\top M_t \beta_{t+1}), \quad t = 0, \dots, N-1 \\ \beta_N &= \theta_N \\ H_t &= M_t - M_t A (Q_t + A^\top M_t A)^{-1} A^\top M_t, \quad t = 0, \dots, N-1 \end{aligned}$$

The optimal controller is

$$u_t^* = -K_t x_t + K'_t \beta_{t+1}, \quad t = 0, \dots, N-1$$

where the parameters are

$$\begin{aligned} K_t &= (R_t + B^\top P_{t+1} B)^{-1} B^\top P_{t+1} A \\ K'_t &= (R_t + B^\top P_{t+1} B)^{-1} B^\top P_{t+1} \end{aligned}$$

There is another way to write the optimal controller:

$$u_t^* = -K_t x_t + K_t^\alpha \alpha_{t+1} \quad t = 0, \dots, N-1$$

where the parameters are

$$\begin{aligned} K_t^\alpha &= (R_t + B^\top P_{t+1} B)^{-1} B^\top \\ \alpha_t &= P_t \beta_t \\ \alpha_t &= Q_t \theta_t + (A - B K_t)^\top \alpha_{t+1}, \quad t = 0, \dots, N-1 \\ \alpha_N &= P_N \theta_N \end{aligned}$$

*Proof.* The proof is straightforward by following dynamic programming procedures.

Firstly, it is direct to verify that  $V_N(x_N) = \frac{1}{2}(x_N - \theta_N)^\top Q_N(x_N - \theta_N)$ . Then, suppose the claim of Theorem 4 is true at  $t+1$ , we will verify the stage  $t$  in the following.

$$\begin{aligned} V_t(x_t) &= \min_{u_t} \left[ \frac{1}{2}(x_t - \theta_t)^\top Q_t(x_t - \theta_t) + \frac{1}{2}u_t^\top R_t u_t + V_{t+1}(Ax_t + Bu_t) \right] \\ &= \frac{1}{2} \min_{u_t} \left[ (x_t - \theta_t)^\top Q_t(x_t - \theta_t) + u_t^\top R_t u_t + (Ax_t + Bu_t - \beta_{t+1})^\top P_{t+1}(Ax_t + Bu_t - \beta_{t+1}) \right. \\ &\quad \left. + \sum_{k=t+1}^{N-1} (A\theta_k - \beta_{k+1})^\top H_k(A\theta_k - \beta_{k+1}) \right] \\ &= \frac{1}{2}(Ax_t - \beta_{t+1})^\top (P_{t+1} - P_{t+1}B(R_t + B^\top P_{t+1}B)^{-1}B^\top P_{t+1})(Ax_t - \beta_{t+1}) \\ &\quad + \frac{1}{2}(x_t - \theta_t)^\top Q_t(x_t - \theta_t) + \frac{1}{2} \sum_{k=t+1}^{N-1} (A\theta_k - \beta_{k+1})^\top H_k(A\theta_k - \beta_{k+1}) \\ &= \frac{1}{2}(Ax_t - \beta_{t+1})^\top M_t(Ax_t - \beta_{t+1}) + \frac{1}{2}(x_t - \theta_t)^\top Q_t(x_t - \theta_t) \\ &\quad + \frac{1}{2} \sum_{k=t+1}^{N-1} (A\theta_k - \beta_{k+1})^\top H_k(A\theta_k - \beta_{k+1}) \\ &= \frac{1}{2}(x_t - \beta_t)^\top P_t(x_t - \beta_t) - \frac{1}{2}(Q_t \theta_t + A^\top M_t \beta_{t+1})^\top (Q_t + A^\top M_t A)^{-1} (Q_t \theta_t + A^\top M_t \beta_{t+1}) \\ &\quad + \frac{1}{2} \theta_t^\top Q_t \theta_t + \frac{1}{2} \beta_{t+1}^\top M_t \beta_{t+1} + \frac{1}{2} \sum_{k=t+1}^{N-1} (A\theta_k - \beta_{k+1})^\top H_k(A\theta_k - \beta_{k+1}) \\ &= \frac{1}{2}(x_t - \beta_t)^\top P_t(x_t - \beta_t) + \frac{1}{2} \sum_{k=t}^{N-1} (A\theta_k - \beta_{k+1})^\top H_k(A\theta_k - \beta_{k+1}) \end{aligned}$$

where the third equality is by noticing that the optimal control input is

$$u_t^* = -(R_t + B^\top P_{t+1} B)^{-1} B^\top P_{t+1}(Ax_t - \beta_{t+1}) = -K_t x_t + K_t' \beta_{t+1},$$

the fourth equality is by  $M_t$ 's definition, the fifth equality is by combining the two quadratic terms of  $x_t$  as one quadratic term with a constant, and the last equality is by definition.  $\square$

## G.2 Proof of Lemma 9

In the following, we first prove that the recursive solution  $P_t$  to the finite-horizon LQT is bounded. Then, we can prove Lemma 9 by taking limits.

**Lemma 13** (Bounded  $P_t$  for finite-horizon LQT). *Consider a finite-horizon time-varying LQT problem. For any  $N$ , any  $0 \leq t \leq N$ , any  $Q_t \in \mathcal{Q}$ ,  $R_t \in \mathcal{R}$ ,  $Q_N \in \mathcal{P}$ , we have  $P_t \in \mathcal{P}$  where  $P_t$  is defined in Theorem 4.*

*Proof.* In the following, we use the notations and definitions introduced in Appendix E.1 and Theorem 4.

Since  $P_t$  does not depend on  $\theta_t$ , we let  $\theta_t = 0$  and consider the LQR problem for simplicity. Since  $\underline{Q} \leq Q_t \leq \bar{Q}$ ,  $\underline{R} \leq R_t \leq \bar{R}$ , for  $0 \leq t \leq N-1$  and  $\underline{P} \leq Q_N \leq \bar{P}$ , we have for any  $x_t, u_t, k$ ,  $\bar{Q}_t, R_t, Q_N$ ,

$$\begin{aligned} \sum_{t=k}^{N-1} (x_t^\top Q_t x_t + u_t^\top R_t u_t) + x_N^\top Q_N x_N &\leq \sum_{t=k}^{N-1} (x_t^\top \bar{Q}_t x_t + u_t^\top \bar{R}_t u_t) + x_N^\top \bar{P} x_N \\ \sum_{t=k}^{N-1} (x_t^\top Q_t x_t + u_t^\top R_t u_t) + x_N^\top Q_N x_N &\geq \sum_{t=k}^{N-1} (x_t^\top \underline{Q}_t x_t + u_t^\top \underline{R}_t u_t) + x_N^\top \underline{P} x_N \end{aligned}$$

Taking minimum over all feasible trajectories on both sides yields

$$\begin{aligned} \min \sum_{t=k}^{N-1} (x_t^\top Q_t x_t + u_t^\top R_t u_t) + x_N^\top Q_N x_N &\leq \min \sum_{t=k}^{N-1} (x_t^\top \bar{Q}_t x_t + u_t^\top \bar{R}_t u_t) + x_N^\top \bar{P} x_N \\ \min \sum_{t=k}^{N-1} (x_t^\top Q_t x_t + u_t^\top R_t u_t) + x_N^\top Q_N x_N &\geq \min \sum_{t=k}^{N-1} (x_t^\top \underline{Q}_t x_t + u_t^\top \underline{R}_t u_t) + x_N^\top \underline{P} x_N \end{aligned}$$

Notice that the left-hand-side terms of both inequalities are equal to  $x_k^\top P_k x_k$ . Moreover, notice that

$$x_k^\top \bar{P} x_k = \min_{x_{t+1}=Ax_t+Bu_t} \sum_{t=k}^{N-1} (x_t^\top \bar{Q}_t x_t + u_t^\top \bar{R}_t u_t) + x_N^\top \bar{P} x_N$$

because  $\bar{P} = P^e(\bar{Q}, \bar{R})$  is the solution to the DARE. The same holds for  $\underline{P}$ . Therefore, we have

$$x_k^\top \underline{P} x_k \leq x_k^\top P_k x_k \leq x_k^\top \bar{P} x_k$$

for any  $x_k$ . Thus,  $\underline{P} \leq P_k \leq \bar{P}$ , i.e.  $P_k \in \mathcal{P}$ .  $\square$

*Proof of Lemma 9.* In the following, we use the notations and definitions introduced in Appendix E.1 and Theorem 4. Since  $P^e$  is not influenced by  $\theta_t$ , we let  $\theta_t = 0$  for simplicity. Consider a finite-horizon LQR problem:  $\sum_{k=0}^{N-1} (x_k^\top Q x_k + u_k^\top R u_k) + x_N^\top Q_N x_N$ , where  $Q_N \in \mathcal{P}$ . By Lemma 13, we have  $P_k \in \mathcal{P}$ . Since  $P_k \rightarrow P^e$  as  $k \rightarrow -\infty$  [59], and since  $\mathcal{P}$  is a closed set [64], we have  $P^e \in \mathcal{P}$ . Since  $P^e$  and  $\bar{P}$  are positive definite, we have  $\|P^e\|_2 \leq v_{max}(\bar{P})$ .  $\square$

### G.3 Proof of Lemma 6

In the following, we will provide and prove an enhanced version of Lemma 6 with detailed characterization of the solution to the Bellman equations in Proposition 1.

**Proposition 1** (Optimal solution to average-cost LQ tracking). *Suppose  $(A, B)$  is controllable,  $Q, R$  are positive definite. The optimal average cost  $\lambda^e$  does not depend on the initial state  $x_0$  and is equal to*

$$\lambda^e = \frac{1}{2} (A\theta - \beta^e)^\top H^e (A\theta - \beta^e),$$

where  $M^e = P^e - P^e B (R + B^\top P^e B)^{-1} B^\top P^e$  and  $H^e = M^e - M^e A (Q + A^\top M^e A)^{-1} A^\top M^e$ .

In addition, a bias function of the Bellman equations  $h^e(x) + \lambda^e = \min_u (f(x) + g(u) + h^e(Ax + Bu))$  can be represented by

$$h^e(x) = \frac{1}{2} (x - \beta^e)^\top P^e (x - \beta^e).$$

where  $P^e = P^e(Q, R)$ .

The optimal controller is

$$u = -K^e x + K' \beta^e$$

where  $K^e = (R + B^\top P^e B)^{-1} B^\top P^e A$ ,  $K' = (R + B^\top P^e B)^{-1} B^\top P^e$ , and  $\beta^e$  satisfies

$$\beta^e = (P^e)^{-1} \alpha^e = F \theta \tag{24}$$

where  $\alpha^e = Q\theta + (A - BK^e)^\top \alpha^e$  and thus  $F = (P^e)^{-1} (I - (A - BK^e)^\top)^{-1} Q$ .

*Proof of Proposition 1.* It is easy to see that the formulas of  $\lambda^e$ ,  $h^e(x)$ , and the optimal controller are the limits of the corresponding formulas or the limiting solutions to the corresponding iterative equations under fixed  $Q, R, \theta$  in Theorem 4. However, to formally prove these formulas, we still need to prove the existence of the limits, which is the focus of the following proof. In particular, the proof consists of three parts: i) verify the formula of the optimal average cost  $\lambda^e$ , ii) verify the formula of the bias function  $h^e(x)$ , iii) verify the formula of the optimal controller.

*Part i): Verify the formula of  $\lambda^e$ .* Consider a finite horizon LQT problem:

$$\begin{aligned} \min_{x_t, u_t} \quad & \frac{1}{2} \sum_{t=0}^{N-1} [(x_t - \theta)^\top Q (x_t - \theta) + u_t^\top R u_t] \\ \text{s.t.} \quad & x_{t+1} = Ax_t + Bu_t, \quad t = 0, \dots, N-1 \end{aligned}$$

Given an initial state  $x_0$ , by Theorem 4, the total optimal cost in  $N$  time steps is

$$J_N^*(x_0) = \frac{1}{2}(x_0 - \beta_0)^\top P_0(x_0 - \beta_0) + \frac{1}{2} \sum_{k=0}^{N-1} (A\theta - \beta_{k+1})^\top H_k(A\theta - \beta_{k+1})$$

If we can show that  $\beta_k \rightarrow \beta^e$  and  $P_k \rightarrow P^e$  and  $H_k \rightarrow H^e$  as  $k \rightarrow -\infty$ , then, consequently, we will have  $\frac{1}{2}(A\theta - \beta_{k+1})^\top H_k(A\theta - \beta_{k+1}) \rightarrow \frac{1}{2}(A\theta - \beta^e)^\top H^e(A\theta - \beta^e)$  as  $k \rightarrow -\infty$ , and bounded  $\frac{1}{2}(x_0 - \beta_0)^\top P_0(x_0 - \beta_0)$  for fixed  $x_0$ . Then the formula of the optimal average cost in infinite horizon can be proved by

$$\begin{aligned} \lambda^e &= \lim_{N \rightarrow +\infty} \left[ \frac{1}{N} \min_{x_{t+1}=Ax_t+Bu_t} \left( \frac{1}{2} \sum_{t=0}^{N-1} ((x_t - \theta)^\top Q (x_t - \theta) + u_t^\top R u_t) \right) \right] \\ &= \lim_{N \rightarrow +\infty} \left[ \frac{1}{N} \left( \frac{1}{2}(x_0 - \beta_0)^\top P_0(x_0 - \beta_0) + \frac{1}{2} \sum_{k=0}^{N-1} (A\theta - \beta_{k+1})^\top H_k(A\theta - \beta_{k+1}) \right) \right] \\ &= \frac{1}{2}(A\theta - \beta^e)^\top H^e(A\theta - \beta^e), \end{aligned}$$

Therefore, it suffices to prove  $\beta_k \rightarrow \beta^e$ ,  $P_k \rightarrow P^e$  and  $H_k \rightarrow H^e$  as  $k \rightarrow -\infty$ .

By Proposition 4.4.1 [59],  $P_k \rightarrow P^e$  as  $k \rightarrow -\infty$ . Then,  $M_k \rightarrow M^e$  as  $k \rightarrow -\infty$  since  $M_k$  is a continuous function of  $P_k$  by noticing that the matrix inverse operator is continuous when the matrix is invertible. Similarly,  $H_k \rightarrow H^e$  as  $k \rightarrow -\infty$  since  $H_k$  is a continuous function of  $M_k$ . In addition,  $K_k \rightarrow K^e$ , and  $K_k^\alpha \rightarrow K^\alpha$  and  $K_k' \rightarrow K'$  as  $k \rightarrow -\infty$  since  $K_k, K_k^\alpha, K_k'$  are continuous functions of  $P_k$ .

To show  $\beta_k \rightarrow \beta^e$ , we only need to show  $\alpha_k \rightarrow \alpha^e$  as  $k \rightarrow -\infty$  since  $\beta_k = P_k^{-1} \alpha_k$ .  $\alpha_k$  satisfies the recursive equation  $\alpha_k = Q\theta + (A - BK_{k+1})^\top \alpha_{k+1}$ . Since  $(A - BK_k)^\top \rightarrow (A - BK^e)^\top$  as  $k \rightarrow -\infty$  and  $(A - BK^e)^\top$  is a stable matrix, by the claim below, we can show  $\alpha_k \rightarrow \alpha^e$  as  $k \rightarrow -\infty$ . Then, the proof of Part i) is completed.

**Claim:** If  $A_t \rightarrow A$  and  $A$  is stable, then the state of the system  $x_{t+1} = A_t x_t + \eta$  will converge to  $x^s$ , where  $x^s = Ax^s + \eta$ , for any bounded initial value  $x_0$ .

The proof of the claim lemma is provided at the end of this subsection.

*Part ii): Verify  $h^e(x)$ 's formula.* The proof is by showing the Bellman equations hold under the formulas of  $h^e(x)$  and  $\lambda^e$  provided in the statement of the lemma.

$$\begin{aligned} \min_u \quad & \left[ \frac{1}{2}(x - \theta)^\top Q (x - \theta) + \frac{1}{2}u^\top R u + \frac{1}{2}(Ax + Bu - \beta^e)^\top P^e(Ax + Bu - \beta^e) \right] \\ &= \frac{1}{2}(x - \theta)^\top Q (x - \theta) + \frac{1}{2}(Ax - \beta^e)^\top M^e(Ax - \beta^e) \\ &\quad + \min_u \frac{1}{2}(u + K^e x - K' \beta^e)^\top (R + B^\top P^e B)(u + K^e x - K' \beta^e) \\ &= \frac{1}{2}(x - \theta)^\top Q (x - \theta) + \frac{1}{2}(Ax - \beta^e)^\top M^e(Ax - \beta^e) \end{aligned}$$

$$= \frac{1}{2}(A\theta - \beta^e)^\top H^e(A\theta - \beta) + \frac{1}{2}(x - \beta^e)^\top P^e(x - \beta^e)$$

where the last equality is by  $Q + A^\top M^e A = P^e$ ,  $\beta^e = (P^e)^{-1} \alpha^e$ ,  $\alpha^e = Q\theta + (A - BK^e)^\top \alpha^e$  and the formulas of  $K^e, M^e$ .

*Part iii): Verify the formula of the optimal controller.* We prove  $u = -K^e x + K' \beta^e$  is the optimal controller by showing that the average cost by implementing this controller is no more than the optimal average cost  $\lambda^e$ . Let  $x_t, u_t$  be the state and control at  $t$  by implementing the controller  $u = -K^e x + K' \beta^e$ .

$$\begin{aligned} & \frac{1}{N} \left( \frac{1}{2} \sum_{t=0}^{N-1} [(x_t - \theta)^\top Q(x_t - \theta) + u_t^\top R u_t] \right) \\ & \leq \frac{1}{N} \left( \frac{1}{2} \sum_{t=0}^{N-1} [(x_t - \theta)^\top Q(x_t - \theta) + u_t^\top R u_t] + \frac{1}{2} (x_N - \beta^e)^\top P^e (x_N - \beta^e) \right) \\ & = \frac{1}{N} \left( \frac{1}{2} (x_0 - \beta^e)^\top P^e (x_0 - \beta^e) + \frac{1}{2} \sum_{k=0}^{N-1} (A\theta - \beta^e)^\top H^e (A\theta - \beta^e) \right) \end{aligned}$$

where the last equality is by Theorem 4. Taking  $N \rightarrow +\infty$  on both sides, we have

$$\lim_{N \rightarrow +\infty} \frac{1}{N} \frac{1}{2} \sum_{t=0}^{N-1} [(x_t - \theta)^\top Q(x_t - \theta) + u_t^\top R u_t] \leq \frac{1}{2} (A\theta - \beta^e)^\top H^e (A\theta - \beta^e) = \lambda^e$$

This completes the proof.  $\square$

**Proof of Claim:** Define the error term  $d_t = x_t - x^s$ . The dynamics of  $d_t$  is  $d_{t+1} = A d_t + w_t$ , where  $w_t = (A_t - A)(d_t + x^s)$ . It suffices to show  $d_t \rightarrow 0$  as  $t \rightarrow +\infty$ . In the following, we will first prove two facts, based on which we prove  $d_t \rightarrow 0$ .

**Fact 1:** Consider a stable matrix  $A$  and a sequence of uniformly bounded vectors:  $\|v_t\|_2 \leq D$  for all  $t$ . There exists a constant  $c_6 > 0$  determined by  $A$ , such that, for any  $k = 1, 2, \dots$ ,

$$\left\| \sum_{t=0}^{k-1} A^t v_t \right\|_2 \leq c_6 D.$$

**Proof of Fact 1:** This is a consequence of the fact that exponential stability implies bounded-input-bounded-output stability. To see this, consider a system  $x_{t+1} = A x_t + u_t$  with  $x_0 = 0$ . Since  $A$  is stable, the system is exponentially stable. By Theorem 9.4 [53], the exponential stability implies the bounded-input-bounded-output stability. Thus, there exists  $c_6$  such that  $\|x_k\|_2 \leq c_6 D$  for any  $k$  and any input sequence satisfying  $\|u_t\|_2 \leq D$  for all  $t$ .

For any  $k \geq 0$ , consider inputs  $u_t = v_{k-1-t}$  for  $0 \leq t \leq k-1$ , then  $x_k = \sum_{t=0}^{k-1} A^t v_t$ . Since  $\|u_t\| \leq D$ , we have  $\|x_k\| \leq c_6 D$ , which completes the proof.  $\square$

**Fact 2:** There exists a constant  $D > 0$ , such that  $\max_{t \geq 0} (\|x^s\|, \|d_t\|) \leq D$ .

**Proof of Fact 2:** Since  $A_t \rightarrow A$ , for  $\epsilon_1 = 1/(4c_6)$ , there exists  $N_1$ , such that when  $t \geq N_1$ ,  $\|A_t - A\| \leq \epsilon_1$ . Since  $A$  is stable, we have  $A^t \rightarrow 0$ , so for  $\epsilon_2 = 1/2$ , there exists  $N_2$ , such that when  $t > N_2$ ,  $\|A^t\| \leq \epsilon_2$ .

Let  $D = \max(\|d_0\|, \dots, \|d_{N_1+N_2}\|, \|x^s\|)$ . By definition,  $\|d_t\| \leq D$  for  $t \leq N_1 + N_2$ . We can show  $\|d_{N_1+N_2+1}\| \leq D$  in the following.

$$\begin{aligned} \|d_{N_1+N_2+1}\| &= \|A^{N_2+1} d_{N_1} + w_{N_1+N_2} + A w_{N_1+N_2-1} + \dots + A^{N_2} w_{N_1}\| \\ &\leq \|A^{N_2+1}\|_2 D + \|w_{N_1+N_2} + A w_{N_1+N_2-1} + \dots + A^{N_2} w_{N_1}\| \\ &\leq \epsilon_2 D + c_6 \max_{N_1 \leq k \leq N_1+N_2} \|w_k\| \\ &\leq \epsilon_2 D + 2c_6 \epsilon_1 D = (1/2 + 1/2)D = D \end{aligned}$$

where the second inequality is by Fact 1 and the definitions of  $\epsilon_2$ , and the third inequality is by  $w_k = (A_k - A)(d_k + x^s)$ ,  $k \geq N_1$ , and the definitions of  $D$  and  $\epsilon_1$ .

It can be shown by induction that  $\|d_t\| \leq D$  for any  $t \geq N_1 + N_2 + 1$  in the same way, which completes the proof.  $\square$

**Prove  $d_t \rightarrow 0$ .** We will show that for any  $\epsilon_3 > 0$ , there exists  $N_3$ , such that  $\|d_t\|_2 \leq \epsilon_3$  when  $t > N_3$ . The proof is very similar to the proof of Fact 2.

Since  $A_t \rightarrow A$ , when  $\epsilon'_1 = \epsilon_3/(4c_6D)$ , there exists  $N'_1$ , such that when  $t \geq N'_1$ ,  $\|A_t - A\| \leq \epsilon'_1$ , where  $D$  is defined in Fact 2. Since  $A$  is stable, we have  $A^t \rightarrow 0$ , so when  $\epsilon'_2 = \epsilon_3/(2D)$ , there exists  $N'_2$ , such that when  $t > N'_2$ ,  $\|A^t\| \leq \epsilon'_2$ . Let  $N_3 = N'_1 + N'_2$ . When  $t > N_3$ ,

$$\begin{aligned} \|d_{t+1}\| &= \|A^{t-N'_1+1}d_{N'_1} + w_t + Aw_{t-1} + \dots + A^{t-N'_1}w_{N'_1}\| \\ &\leq \|A^{t-N'_1+1}\|D + \|w_t + Aw_{t-1} + \dots + A^{t-N'_1}w_{N'_1}\|_2 \\ &\leq \epsilon'_2 D + c_6 \max_{N'_1 \leq k \leq t} \|w_k\| \\ &\leq \epsilon'_2 D + 2c_6\epsilon'_1 D = (1/2 + 1/2)\epsilon_3 = \epsilon_3 \end{aligned}$$

where the second inequality is by Fact 1 and the definitions of  $\epsilon_2$ , and the third inequality is by  $w_k = (A_k - A)(d_k + x^s)$ ,  $k \geq N_1$ ,  $\max_{k \geq 0}(\|d_k\|, \|x^s\|) \leq D$ , and the definition of  $\epsilon'_1$ .

This completes the proof of the claim.  $\square$

#### G.4 Proof of Lemma 7.

Let  $x_t^*, u_t^*$  denote the optimal state and the optimal control input at time  $t$  respectively. By Theorem 4, the optimal controller is  $u_t^* = -K_t x_t^* + K_t^\alpha \alpha_t$ . For ease of notation, define

$$D_t := A - BK_t.$$

Then, the dynamical system of  $x_t^*$  can be represented as

$$x_{t+1}^* = D_t x_t^* + BK_t^\alpha \alpha_{t+1}.$$

**Proof outline:** We will prove  $x_t^*$  is bounded by three steps: 1) show that system  $x_{t+1} = D_t x_t$  is exponentially stable, 2) show that  $BK_t^\alpha \alpha_{t+1}$  is bounded, 3) show  $x_t^*$  is bounded by the fact that exponentially stable systems are bounded-input-bounded-output stable.

*Step 1: show  $x_{t+1} = D_t x_t$  is exponentially stable by a Lyapunov function.*

**Lemma 14** (Exponential stability). *Consider dynamical system  $x_{t+1} = D_t x_t$ . Define the state transition matrix:*

$$\Phi(t, t_0) = D_{t-1} \dots D_{t_0}$$

*for  $t \geq t_0$ , and  $\Phi(t, t) = I$ . For any  $N$ , any  $0 \leq t_0 \leq N$ ,  $t_0 \leq t \leq N$ , any  $Q_t \in \mathcal{Q}$ ,  $R_t \in \mathcal{R}$ ,  $Q_N \in \mathcal{P}$ , and for any  $x_{t_0}$ , the system is exponentially stable, i.e.*

$$\|\Phi(t, t_0)\| \leq c_7 c_2^{t-t_0} \quad (25)$$

where  $c_7 = \sqrt{\frac{v_{\max}(\bar{P})}{v_{\min}(\underline{P})}}$ ,  $c_2 = \sqrt{1 - \frac{\mu_f}{v_{\max}(\bar{P})}} \in [0, 1)$ .

*Proof.* We prove the exponential stability by constructing a Lyapunov function:  $L(t, x_t) = x_t^\top P_t x_t$  for  $t \geq 0$ .

**Claim:** *For any  $x_t$ , the Lyapunov function satisfies*

$$v_{\min}(\underline{P})\|x_t\|_2^2 \leq L(t, x_t) \leq v_{\max}(\bar{P})\|x_t\|_2^2, \quad L(t+1, D_t x_t) - L(t, x_t) \leq -\mu_f\|x_t\|_2^2.$$

where  $v_{\max}(\cdot)$  and  $v_{\min}(\cdot)$  denote the maximum and minimum eigenvalues of a matrix respectively.

**Proof of Claim:** By Lemma 13,  $P_t \in \mathcal{P}$ , so  $v_{\min}(\underline{P})I_n \leq \underline{P} \leq P_t \leq \bar{P} \leq v_{\max}(\bar{P})I_n$ . Thus, for any  $x_t$ ,

$$v_{\min}(\underline{P})\|x_t\|_2^2 \leq L(t, x_t) = x_t^\top P_t x_t \leq v_{\max}(\bar{P})\|x_t\|_2^2$$

Besides,

$$\begin{aligned}
L(t+1, D_t x_t) - L(t, x_t) &= x_t^\top D_t^\top P_{t+1} D_t x_t - x_t^\top P_t x_t \\
&= x_t^\top (D_t^\top P_{t+1} D_t - P_t) x_t \\
&= x_t^\top (-Q_t - K_t^\top R_t K_t) x_t \\
&\leq -x_t^\top Q_t x_t = -\mu_f \|x_t\|^2
\end{aligned}$$

where the third equality is by Theorem 4, the first inequality and the last equality are by  $Q_t + K_t^\top R_t K_t \geq \underline{Q} \geq \underline{Q} = \mu_f I_n$ .  $\square$

By the claim above,

$$L(t+1, x_{t+1}) - L(t, x_t) \leq -\mu_f \|x_t\|_2^2 \leq -\frac{\mu_f}{v_{\max}(\bar{P})} L(t, x_t)$$

Thus,  $L(t+1, x_{t+1}) \leq c_2^2 L(t, x_t)$  where  $c_2 = \sqrt{1 - \frac{\mu_f}{v_{\max}(\bar{P})}}$ . Here,  $c_2$  is well-defined because  $0 \leq \mu_f I_n \leq \bar{Q} \leq \bar{P} \leq v_{\max}(\bar{P})$ .

For any  $t_{t_0}$  and any  $x_{t_0}$ , it is easy to verify that the state  $x_t$  satisfies  $x_t = \Phi(t, t_{t_0}) x_{t_0}$ . Therefore,

$$\begin{aligned}
\|\Phi(t, t_0)\| &= \max_{x_{t_0} \neq 0} \frac{\|x_t\|}{\|x_{t_0}\|} \\
&\leq \max_{x_{t_0} \neq 0} \sqrt{\frac{v_{\max}(\bar{P})}{v_{\min}(\underline{P})} \frac{L(t, x_t)}{L(t_0, x_{t_0})}} \\
&\leq \sqrt{\frac{v_{\max}(\bar{P})}{v_{\min}(\underline{P})}} c_2^{t-t_0}
\end{aligned}$$

$\square$

*Step 2: show that  $BK_t^\alpha \alpha_{t+1}$  is bounded. We will show that*

$$\|\alpha_t\| \leq \frac{c_7}{1-c_2} v_{\max}(\bar{P}) \bar{\theta} =: \bar{\alpha}, \quad \|BK_t^\alpha \alpha_t\|_2 \leq \|B\|_2^2 \frac{\bar{\alpha}}{\mu_g}. \quad (26)$$

By Theorem 4,  $\alpha_t$  satisfies the dynamical system  $\alpha_t = D_t^\top \alpha_{t+1} + Q_t \theta_t$ , with initial condition  $\alpha_N = Q_N \theta_N$ . As a result, we can write  $\alpha_t$  in terms of  $\theta_s$  and the transition matrix  $\Phi(t, s)$  as follows

$$\begin{aligned}
\alpha_t &= Q_t \theta_t + D_t^\top Q_{t+1} \theta_{t+1} + \dots + D_t^\top \dots D_{N-1}^\top Q_N \theta_N \\
&= \Phi(t, t)^\top Q_t \theta_t + \Phi(t+1, t)^\top Q_{t+1} \theta_{t+1} + \dots + \Phi(N, t)^\top Q_N \theta_N
\end{aligned}$$

Then, the bound of  $\alpha_t$  can be derived as follows.

$$\begin{aligned}
\|\alpha_t\| &\leq \|\Phi(t, t)^\top\| \|Q_t \theta_t\| + \dots + \|\Phi(N, t)^\top\| \|Q_N \theta_N\| \\
&= \|\Phi(t, t)\| \|Q_t \theta_t\| + \dots + \|\Phi(N, t)\| \|Q_N \theta_N\| \\
&\leq c_7 v_{\max}(\bar{P}) \bar{\theta} + \dots + c_7 c_2^{N-t} v_{\max}(\bar{P}) \bar{\theta} \\
&\leq c_7 v_{\max}(\bar{P}) \bar{\theta} \frac{1}{1-c_2} = \bar{\alpha}
\end{aligned}$$

where the second inequality is by Lemma 14,  $Q_t \leq \bar{Q} \leq \bar{P}$  and  $Q_N \in \mathcal{P}$ .

Consequently,

$$\begin{aligned}
\|BK_t^\alpha \alpha_t\| &= \|B(R_t + B^\top P_{t+1} B)^{-1} B^\top \alpha_t\| \\
&\leq \|B\|^2 \|(R_t + B^\top P_{t+1} B)^{-1}\| \|\alpha_t\| \\
&\leq \|B\|^2 \frac{\bar{\alpha}}{\mu_g}
\end{aligned}$$

*Step 3: bound  $x_t^*$ .*

$$\begin{aligned}
\|x_t^*\| &= \|\Phi(t, t) BK_{t-1}^\alpha \alpha_t + \Phi(t, t-1) BK_{t-2}^\alpha \alpha_{t-1} + \dots + \Phi(t, 1) BK_0^\alpha \alpha_1\| \\
&\leq c_7 \|B\|^2 \frac{\bar{\alpha}}{\mu_g} (1 + c_2 + c_2^2 + \dots) = c_7 \frac{1}{1-c_2} \|B\|^2 \frac{\bar{\alpha}}{\mu_g} =: \bar{x}
\end{aligned}$$

### G.5 Proof of Lemma 8

By Theorem 4 and (26),  $\|\beta_k\| = \|P_k^{-1}\alpha_k\| \leq \frac{1}{v_{\min}(P)}\bar{\alpha}$  for any  $k$ , any  $N$  and any  $Q_t \in \mathcal{Q}, R_t \in \mathcal{R}, Q_N \in \mathcal{P}$ . When  $Q_t = Q \in \mathcal{Q}, R_t = R \in \mathcal{R}$  for all  $t$ ,  $\beta_k \rightarrow \beta^e$  as  $k \rightarrow -\infty$  by the proof (Part i)) of Proposition 1. Thus,  $\|\beta^e\| \leq \frac{1}{v_{\min}(P)}\bar{\alpha}$ . Define  $\bar{\beta} = \max(\bar{\theta}, \frac{1}{v_{\min}(P)}\bar{\alpha})$ . This completes the proof.

## H Simulation descriptions

### H.1 LQT

The experiment settings are as follows. Let  $A = [0, 1; -1/5, 5/6], B = [0; 1], N = 30$ . Consider diagonal  $Q_t, R_t$  with diagonal entries i.i.d. from  $\text{Unif}[1, 2]$ . Let  $\theta_t$  i.i.d. from  $\text{Unif}[-10, 10]$ . The stepsizes of RHGD and RHTM are based on the conditions in Theorem 1. The stepsizes of RHAG can be viewed as RHTM with  $\delta_c = 1/l_c, \delta_y = \delta_\omega = \frac{\sqrt{\zeta}-1}{\sqrt{\zeta}+1}$  and  $\delta_z = 0$ .

### H.2 Robotics tracking

Consider the following discrete-time counterpart of the kinematic model

$$\begin{aligned} x_{t+1} &= x_t + \Delta t \cdot \cos \delta_t \cdot v_t \\ y_{t+1} &= y_t + \Delta t \cdot \sin \delta_t \cdot v_t \\ \delta_{t+1} &= \delta_t + \Delta t \cdot w_t \end{aligned}$$

Thus we have

$$\begin{aligned} \delta_t &= \arctan\left(\frac{y_{t+1} - y_t}{x_{t+1} - x_t}\right) \\ v_t &= \frac{1}{\Delta t} \cdot \sqrt{(x_{t+1} - x_t)^2 + (y_{t+1} - y_t)^2} \\ w_t &= \frac{\delta_{t+1} - \delta_t}{\Delta t} = \frac{1}{\Delta t} \cdot \left[ \arctan\left(\frac{y_{t+2} - y_{t+1}}{x_{t+2} - x_{t+1}}\right) - \arctan\left(\frac{y_{t+1} - y_t}{x_{t+1} - x_t}\right) \right] \end{aligned}$$

So that  $(\delta_t, v_t, w_t)$  can be expressed by the state variables  $(x_t, y_t)$ .

In the simulation, the given reference trajectory is

$$\begin{aligned} x_t^r &= 16 \sin^3(t - 6) \\ y_t^r &= 13 \cos(t) - 5 \cos(2t - 12) - 2 \cos(3t - 18) - \cos(4t - 24) \end{aligned}$$

As for the objective function, we set the cost coefficients as

$$c_t = \begin{cases} 0, & t = 0 \\ 1, & \text{otherwise} \end{cases} \quad c_t^v = \begin{cases} 0, & t = N \\ 15\Delta t^2, & \text{otherwise} \end{cases} \quad c_t^w = \begin{cases} 0, & t = N \\ 15\Delta t^2, & \text{otherwise} \end{cases}$$

The discrete-time resolution for online control is 0.025 second, i.e.,  $\Delta t = 0.025s$ . When implementing each control decision, a much smaller time resolution of 0.001s is used to simulate the real motion dynamics of the robot.
